# Supplementary material for: Impact of ligand chlorination and counterion tuning on high-field spin relaxation in a series of V(iv) complexes
Source: Royal Society of Chemistry journal article supplement (doi:10.1039/d3dt01274c), 2023-01-01
Supplement: d3dt01274c1.pdf [file d3dt01274c1.pdf]

Electronic Supplementary Information for:

# Impact of Ligand Chlorination and Counterion Tuning on High-Field Spin Relaxation in a Series of V(IV) Complexes

Roxanna Martinez,<sup>1</sup> Cassidy E. Jackson,<sup>1</sup> Ökten Üngör,<sup>1</sup> Johan van Tol,<sup>2</sup> and Joseph M. Zadrozny\*<sup>1</sup>

<sup>1</sup>*Department of Chemistry, Colorado State University, Fort Collins, Colorado 80523, USA.*

<sup>2</sup>*National High Magnetic Field Laboratory, Tallahassee, Florida 32310, USA.*

## Table of Contents

| Description                                                                                                | Page   |
|------------------------------------------------------------------------------------------------------------|--------|
| <b>Table S1.</b> Crystallographic information for the structural refinement of <b>2</b> .                  | S3     |
| <b>Table S2.</b> Crystallographic information for the structural refinement of <b>5</b> .                  | S4     |
| <b>Table S3.</b> Crystallographic information for the structural refinement of <b>6</b> .                  | S5     |
| <b>Figure S1.</b> Thermal ellipsoid plot of <b>2</b>                                                       | S6     |
| <b>Figure S2.</b> Thermal ellipsoid plot of <b>5</b>                                                       | S7     |
| <b>Figure S3.</b> Thermal ellipsoid plot of <b>6</b>                                                       | S8     |
| <b>Figure S4.</b> Electron density map of <b>6</b>                                                         | S9     |
| <b>Table S4.</b> Bailar Twist Angles.                                                                      | S10    |
| <b>Table S5.</b> Spin Hamiltonian parameters at 120 GHz for <b>1–8</b> at 5 K.                             | S11    |
| <b>Table S6.</b> Spin Hamiltonian parameters at 9.4 GHz for <b>1–6</b> at 100 K.                           | S12    |
| <b>Table S7.</b> Spin Hamiltonian parameters at 9.4 GHz for <b>2–6</b> at 298 K.                           | S13    |
| <b>Table S8.</b> Fit $T_1$ values.                                                                         | S14-15 |
| <b>Table S9.</b> Fit parameters for the temperature dependence of $T_1$ .                                  | S16    |
| <b>Table S10.</b> Fit $T_m$ values and stretched parameters $\beta$ .                                      | S17-18 |
| <b>Figure S5-S10.</b> $^1\text{H}$ NMR spectrum of <b>2-6</b> in $\text{CDCl}_3$ .                         | S19-21 |
| <b>Figure S11-S15.</b> $^1\text{H}$ NMR spectra of ligands in $\text{CDCl}_3$                              | S22-24 |
| <b>Figure S16.</b> 120 GHz EDFs spectra of <b>1–6</b> in $d^{14}$ - <i>o</i> -terphenyl at 5 K.            | S25    |
| <b>Figure S17.</b> 120 GHz EDFs spectra of <b>7</b> and <b>8</b> in $d^{14}$ - <i>o</i> -terphenyl at 5 K. | S26    |
| <b>Figure S18.</b> CW EPR spectra of <b>1–6</b> in toluene at 298 K.                                       | S27    |
| <b>Figure S19.</b> Selected variable-temperature inversion recovery curves and fits for <b>1</b> .         | S28    |
| <b>Figure S20.</b> Selected variable-temperature inversion recovery curves and fits for <b>2</b> .         | S29    |
| <b>Figure S21.</b> Selected variable-temperature inversion recovery curves and fits for <b>3</b> .         | S30    |
| <b>Figure S22.</b> Selected variable-temperature inversion recovery curves and fits for <b>4</b> .         | S31    |
| <b>Figure S23.</b> Selected variable-temperature inversion recovery curves and fits for <b>5</b> .         | S32    |
| <b>Figure S24.</b> Selected variable-temperature inversion recovery curves and fits for <b>6</b> .         | S33    |
| <b>Figure S25.</b> Selected variable-temperature inversion recovery curves and fits for <b>7</b> .         | S34    |
| <b>Figure S26.</b> Selected variable-temperature inversion recovery curves and fits for <b>8</b> .         | S35    |
| <b>Figure S27.</b> Selected variable-temperature Hahn echo decay curve and fits for <b>1</b> .             | S36    |
| <b>Figure S28.</b> Selected variable-temperature Hahn echo decay curve and fits for <b>2</b> .             | S37    |
| <b>Figure S29.</b> Selected variable-temperature Hahn echo decay curve and fits for <b>3</b> .             | S38    |
| <b>Figure S30.</b> Selected variable-temperature Hahn echo decay curve and fits for <b>4</b> .             | S39    |
| <b>Figure S31.</b> Selected variable-temperature Hahn echo decay curve and fits for <b>5</b> .             | S40    |
| <b>Figure S32.</b> Selected variable-temperature Hahn echo decay curve and fits for <b>6</b> .             | S41    |
| <b>Figure S33.</b> Selected variable-temperature Hahn echo decay curve and fits for <b>7</b> .             | S42    |
| <b>Figure S34.</b> Selected variable-temperature Hahn echo decay curve and fits for <b>8</b> .             | S43    |
| <b>Figure S35.</b> Instantaneous diffusion experiment.                                                     | S44    |

## Full Experimental Details

**Table S1.** Crystallographic information for the structural refinement of **2**.

|                                   |                                                                                                                      |
|-----------------------------------|----------------------------------------------------------------------------------------------------------------------|
| Empirical formula <sup>a</sup>    | H <sub>64</sub> C <sub>42</sub> N <sub>2</sub> Cl <sub>3</sub> O <sub>6</sub> V•1.6[C <sub>4</sub> H <sub>8</sub> O] |
| Formula weight                    | 997.15                                                                                                               |
| Temperature                       | 110(2)                                                                                                               |
| Crystal system                    | monoclinic                                                                                                           |
| Space group                       | P 1 21/c 1                                                                                                           |
| a                                 | 20.0922(9) Å                                                                                                         |
| b                                 | 15.2744(8) Å                                                                                                         |
| c                                 | 17.8164(9) Å                                                                                                         |
| α                                 | 90°                                                                                                                  |
| β                                 | 105.925°                                                                                                             |
| γ                                 | 90°                                                                                                                  |
| Volume                            | 5257.9(5) Å <sup>3</sup>                                                                                             |
| Z                                 | 4                                                                                                                    |
| ρ <sub>calc</sub>                 | 1.448 g/cm <sup>3</sup>                                                                                              |
| μ                                 | 2.921 mm <sup>-1</sup>                                                                                               |
| F(000)                            | 2120                                                                                                                 |
| Crystal color                     | Dark blue                                                                                                            |
| Crystal size                      | 0.184 × 0.164 × 0.158 mm <sup>3</sup>                                                                                |
| Radiation                         | MoKα (λ = 0.71073 Å)                                                                                                 |
| 2θ range for data collection      | 1.699 to 28.268°                                                                                                     |
| Index ranges                      | -26 ≤ h ≤ 26, -20 ≤ k ≤ 20, -23 ≤ l ≤ 23                                                                             |
| Reflections collected             | 335992                                                                                                               |
| Independent collections           | 13015 [R <sub>int</sub> = 0.0666, R <sub>sigma</sub> = 0.0179]                                                       |
| Data/restraints/parameters        | 13015/0/542                                                                                                          |
| Goodness-of-fit on F <sup>2</sup> | 1.041                                                                                                                |
| Final R indexes [I ≥ 2σ (I)]      | R <sub>1</sub> = 0.065979, wR <sub>2</sub> = 0.2051                                                                  |
| Final R indexes [all data]        | R <sub>1</sub> = 0.082232, wR <sub>2</sub> = 0.2306                                                                  |
| Largest diff. peak/hole           | 0.98/-0.52 e Å <sup>-3</sup>                                                                                         |
| Flack parameter                   | 0.000(4)                                                                                                             |

<sup>a</sup>Solvent mask used for stoichiometric details: see CIF and experimental section for details.

**Table S2.** Crystallographic information for the structural refinement of **5**.

|                                   |                                                                                                                      |
|-----------------------------------|----------------------------------------------------------------------------------------------------------------------|
| Empirical formula <sup>a</sup>    | H <sub>62</sub> C <sub>42</sub> N <sub>2</sub> Cl <sub>6</sub> O <sub>6</sub> V•1.7[C <sub>4</sub> H <sub>8</sub> O] |
| Formula weight                    | 954.57                                                                                                               |
| Temperature                       | 104(2)                                                                                                               |
| Crystal system                    | trigonal                                                                                                             |
| Space group                       | P31 2 1                                                                                                              |
| a                                 | 15.2509(4) Å                                                                                                         |
| b                                 | 15.2509(4) Å                                                                                                         |
| c                                 | 18.9173(6) Å                                                                                                         |
| α                                 | 90°                                                                                                                  |
| β                                 | 90°                                                                                                                  |
| γ                                 | 120°                                                                                                                 |
| Volume                            | 3810.5(2) Å <sup>3</sup>                                                                                             |
| Z                                 | 3                                                                                                                    |
| ρ <sub>calc</sub>                 | 1.248 g/cm <sup>3</sup>                                                                                              |
| μ                                 | 0.553 mm <sup>-1</sup>                                                                                               |
| F(000)                            | 1503                                                                                                                 |
| Crystal color                     | Dark blue                                                                                                            |
| Crystal size                      | 0.143 × 0.117 × 0.0181 mm <sup>3</sup>                                                                               |
| Radiation                         | MoKα (λ = 0.71073 Å)                                                                                                 |
| 2θ range for data collection      | 1.542 to 27.472°                                                                                                     |
| Index ranges                      | -19 ≤ h ≤ 19, -19 ≤ k ≤ 19, -24 ≤ l ≤ 24                                                                             |
| Reflections collected             | 227182                                                                                                               |
| Independent collections           | 5840 [R <sub>int</sub> = 0.0832, R <sub>sigma</sub> = 0.0181]                                                        |
| Data/restraints/parameters        | 5840/0/261                                                                                                           |
| Goodness-of-fit on F <sup>2</sup> | 1.120                                                                                                                |
| Final R indexes [I ≥ 2σ (I)]      | R <sub>1</sub> = 0.0304, wR <sub>2</sub> = 0.0794                                                                    |
| Final R indexes [all data]        | R <sub>1</sub> = 0.0362, wR <sub>2</sub> = 0.0892                                                                    |
| Largest diff. peak/hole           | 0.95/-0.69 e Å <sup>-3</sup>                                                                                         |
| Flack parameter                   | 0.0(7)                                                                                                               |

<sup>a</sup>Solvent mask used for stoichiometric details see CIF file and experimental section

**Table S3.** Crystallographic information for the structural refinement of **6**.

|                                   |                                                                                  |
|-----------------------------------|----------------------------------------------------------------------------------|
| Empirical formula                 | C <sub>42</sub> H <sub>56</sub> Cl <sub>12</sub> N <sub>2</sub> O <sub>6</sub> V |
| Formula weight                    | 1161.22                                                                          |
| Temperature                       | 99.9(7)                                                                          |
| Crystal system                    | triclinic                                                                        |
| Space group                       | P-1                                                                              |
| a                                 | 11.541(10) Å                                                                     |
| b                                 | 12.302(10) Å                                                                     |
| c                                 | 37.11(2) Å                                                                       |
| α                                 | 95.54(10)°                                                                       |
| β                                 | 106.49(10)°                                                                      |
| γ                                 | 95.79(10)°                                                                       |
| Volume                            | 2575.27(4) Å <sup>3</sup>                                                        |
| Z                                 | 2                                                                                |
| ρ <sub>calc</sub>                 | 2.048 g/cm <sup>3</sup>                                                          |
| μ                                 | 7.717 mm <sup>-1</sup>                                                           |
| F(000)                            | 1194                                                                             |
| Crystal color                     | Dark blue                                                                        |
| Crystal size                      | 0.126 x 0.074 x 0.054 mm <sup>3</sup>                                            |
| Radiation                         | MoKα (λ = 0.71076 Å)                                                             |
| 2θ range for data collection      | 2.424 to 78.171°                                                                 |
| Index ranges                      | -14 ≤ h ≤ 15, -15 ≤ k ≤ 15, -24 ≤ l ≤ 24                                         |
| Reflections collected             | 60728                                                                            |
| Independent collections           | 10949 [R <sub>int</sub> = 0.0422, R <sub>sigma</sub> = 0.0332]                   |
| Data/restraints/parameters        | 10949 /876/690                                                                   |
| Goodness-of-fit on F <sup>2</sup> | 1.078                                                                            |
| Final R indexes [I ≥ 2σ (I)]      | R <sub>1</sub> = 0.0441, wR <sub>2</sub> = 0.1087                                |
| Final R indexes [all data]        | R <sub>1</sub> = 0.0487, wR <sub>2</sub> = 0.1123                                |
| Largest diff. peak/hole           | 1.24/-1.54 e Å <sup>-3</sup>                                                     |
| Flack parameter                   | 0.065(5)                                                                         |

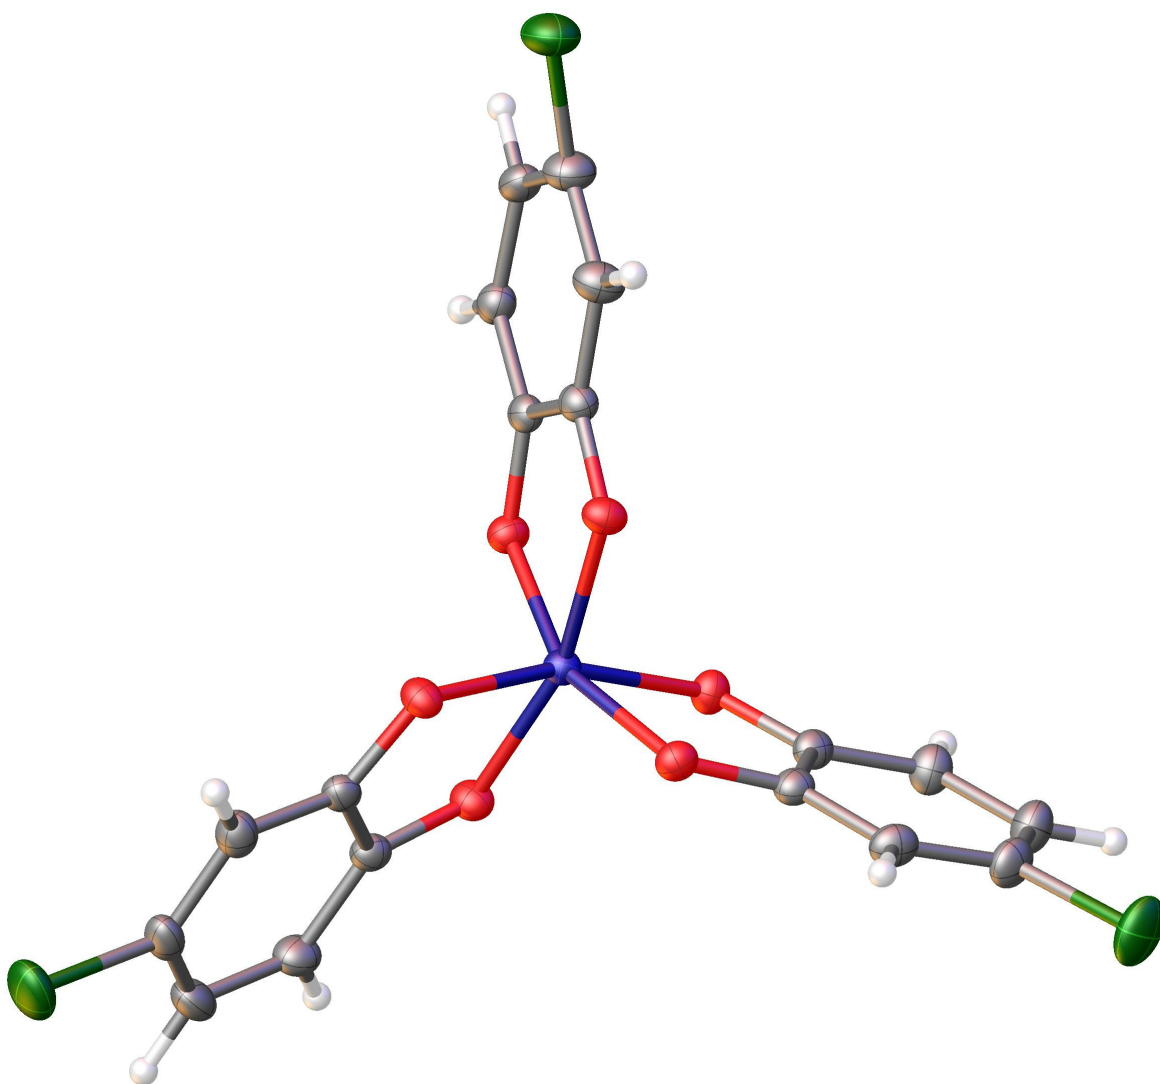

**Figure S1.** Thermal ellipsoid plot of **2** drawn at the 50% probability level. Counterions and solvent molecules were removed for clarity. Purple, red, green, grey, and white ellipsoids correspond to vanadium, oxygen, chlorine, carbon, and hydrogen, respectively.

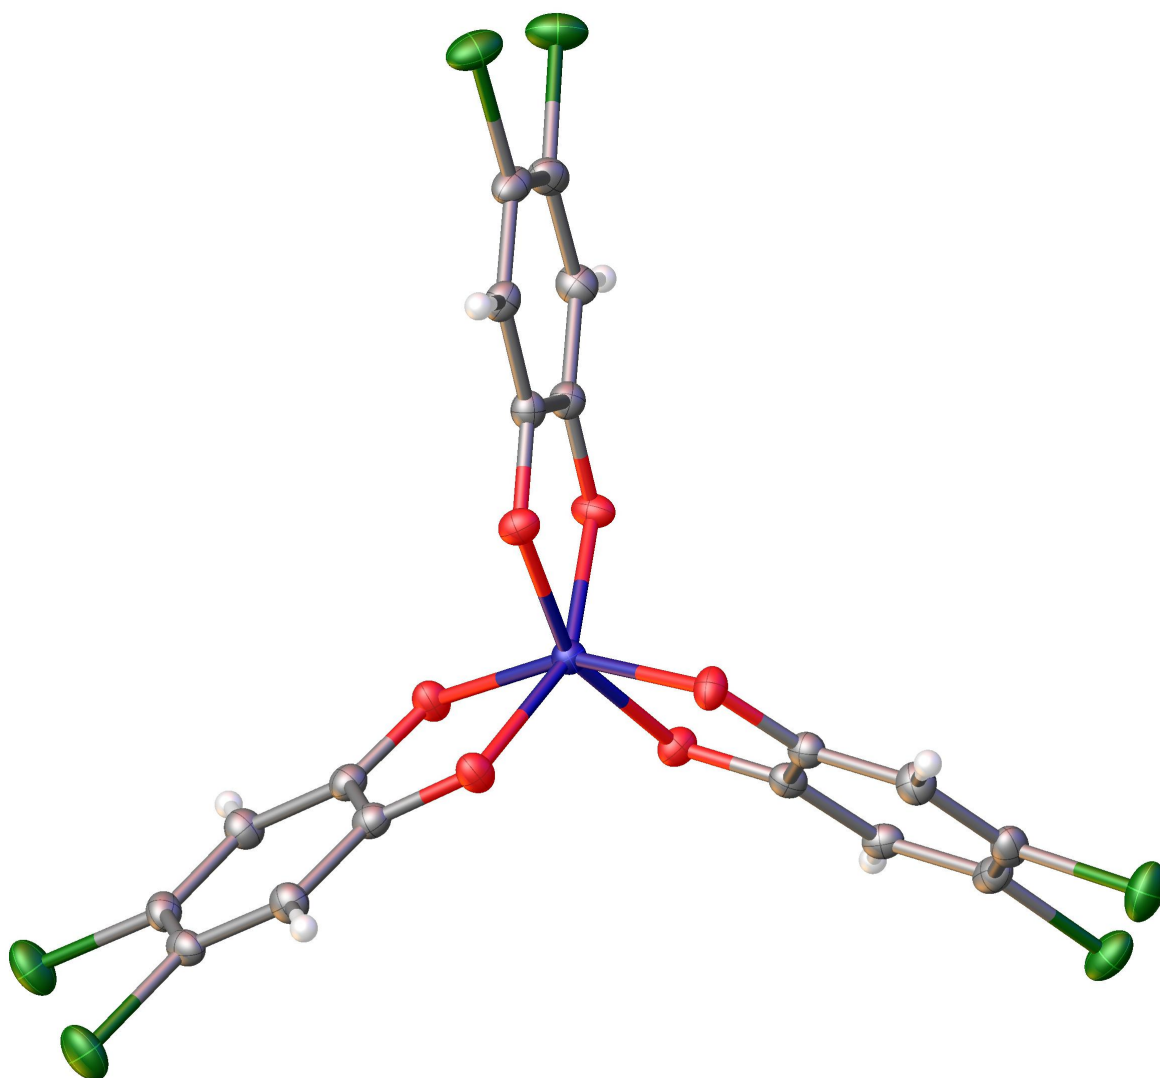

**Figure S2.** Thermal ellipsoid plot of **5** drawn at the 50% probability level. Counterions and solvent molecules were removed for clarity. Purple, red, green, grey, and white ellipsoids correspond to vanadium, oxygen, chlorine, carbon, and hydrogen, respectively.

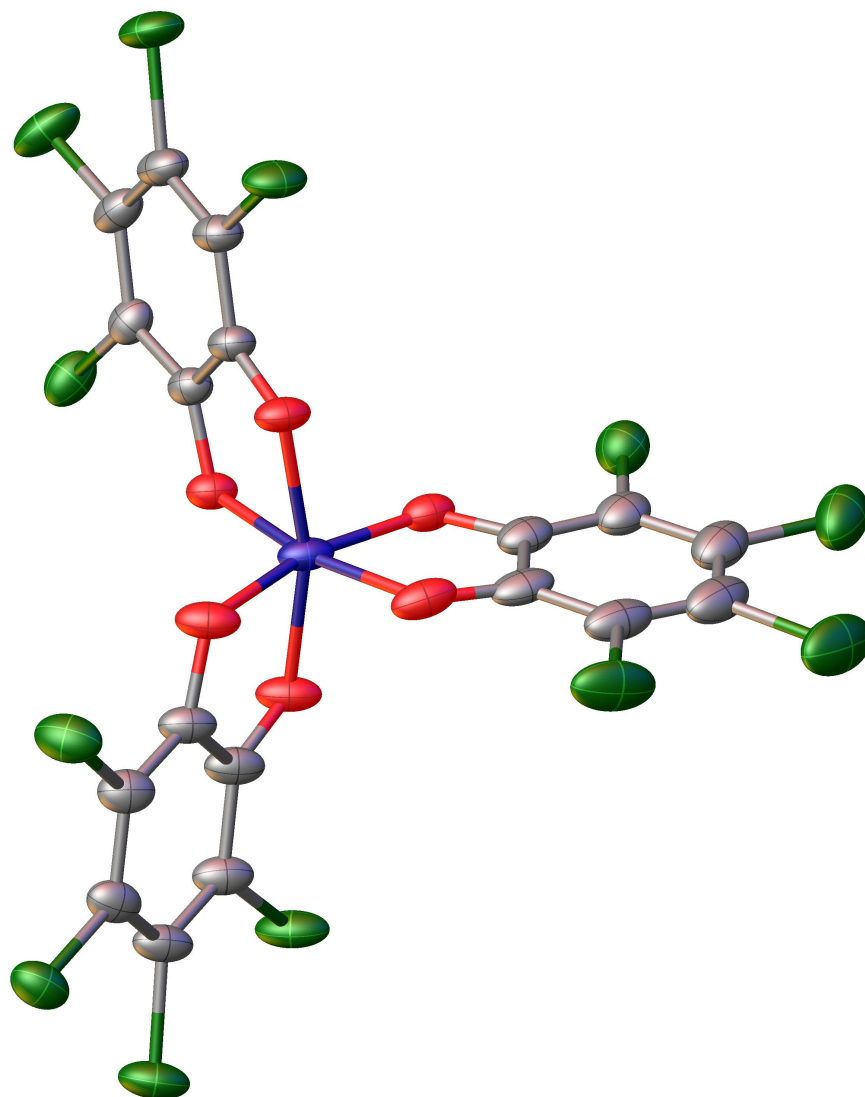

**Figure S3.** Thermal ellipsoid plot of **6** drawn at the 50% probability level. Counterions and solvent molecules were removed for clarity. Purple, red, green, grey, and white ellipsoids correspond to vanadium, oxygen, chlorine, carbon, and hydrogen, respectively.



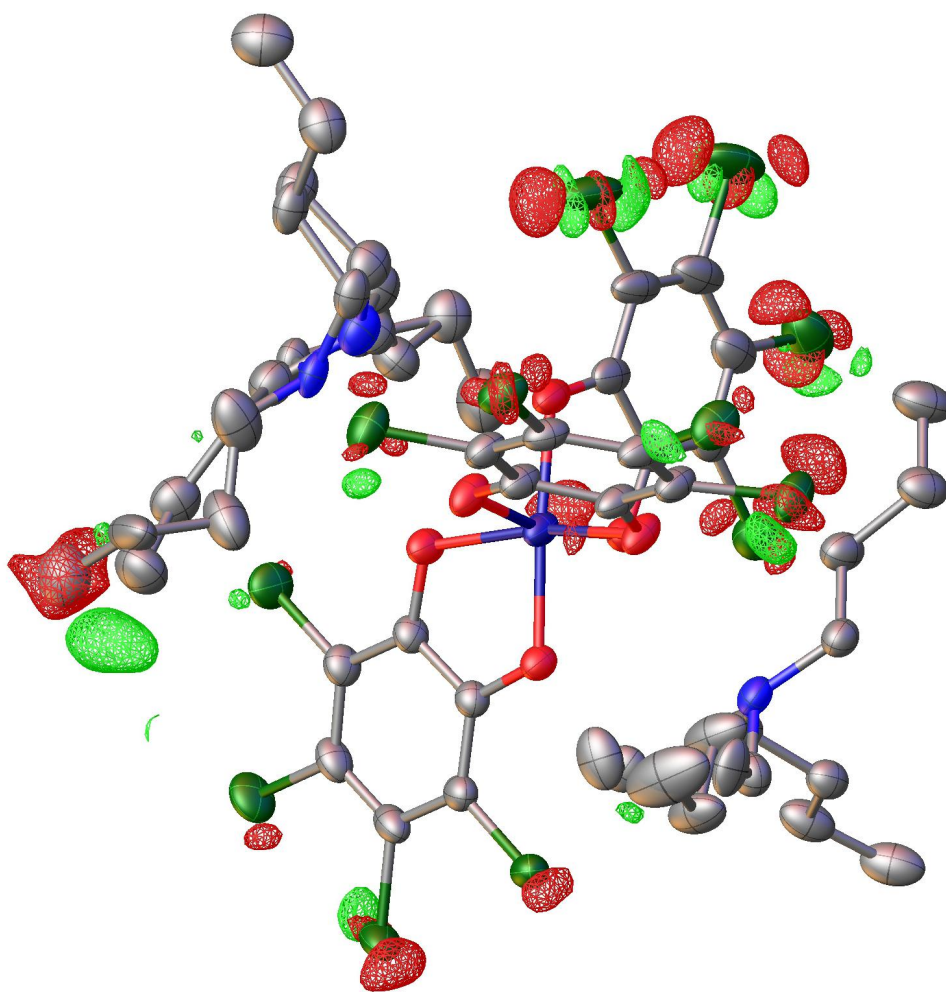

**Figure S4.** Electron density map of **6** suggesting slight unresolved disorder on the ligands and counterions. Residual electron density in the unit cell is located primarily near the Cl atoms and extends along the longest anisotropic displacement axes, which is common for heavy atoms and suggests slight ligand disorder. Hydrogens were omitted for clarity. Purple, red, green, grey, and white ellipsoids correspond to vanadium, oxygen, chlorine, and carbon, respectively.

**Table S4.** Calculated Bailar twist angle ( $\theta$ ) for complexes **1-6**.

| Complex                                                                                           | $\theta_1$ | $\theta_2$ | $\theta_3$ | Avg. $\theta$ |
|---------------------------------------------------------------------------------------------------|------------|------------|------------|---------------|
| $(n\text{-Bu}_3\text{NH})_2[\text{V}(\text{C}_6\text{H}_4\text{O}_2)_3]$                          | 27.33      | 27.33      | 25.22      | 26.62         |
| $(n\text{-Bu}_3\text{NH})_2[\text{V}(\mathbf{4}\text{-Br-C}_6\text{H}_3\text{O}_2)_3]$            | 23.34      | 27.47      | 23.34      | 24.71         |
| $(n\text{-Bu}_3\text{NH})_2[\text{V}(\mathbf{4,5}\text{-Br}_2\text{-C}_6\text{H}_3\text{O}_2)_3]$ | 18.93      | 18.00      | 18.93      | 18.62         |
| $(n\text{-Bu}_3\text{NH})_2[\text{V}(\text{C}_6\text{Br}_4\text{O}_2)_3]$                         | 28.08      | 33.82      | 26.98      | 29.63         |
| $(n\text{-Bu}_3\text{NH})_2[\text{V}(\mathbf{4}\text{-Cl-C}_6\text{H}_3\text{O}_2)_3]$            | 23.34      | 22.76      | 24.93      | 23.35         |
| $(n\text{-Bu}_3\text{NH})_2[\text{V}(\mathbf{4,5}\text{-Cl}_2\text{-C}_6\text{H}_3\text{O}_2)_3]$ | 18.70      | 18.63      | 18.70      | 18.67         |
| $(n\text{-Bu}_3\text{NH})_2[\text{V}(\text{C}_6\text{Cl}_4\text{O}_2)_3]$                         | 26.52      | 31.78      | 26.94      | 28.41         |

**Table S5.** EDFs spin Hamiltonian parameters for **1–8** in  $d^{14}$ -*o*-terphenyl collected at 5 K. The standard errors for these parameters were not available from the simulating process.

| Complex      | <b>1</b> | <b>2</b> | <b>3</b> | <b>4</b> | <b>5</b> | <b>6</b> | <b>7</b> | <b>8</b> |
|--------------|----------|----------|----------|----------|----------|----------|----------|----------|
| $g_x$        | 1.939    | 1.943    | 1.942    | 1.940    | 1.942    | 1.938    | 1.940    | 1.940    |
| $g_y$        | 1.923    | 1.923    | 1.925    | 1.920    | 1.915    | 1.913    | 1.920    | 1.918    |
| $g_z$        | 1.990    | 1.992    | 1.993    | 1.993    | 1.993    | 1.992    | 1.991    | 1.990    |
| $g_x$ strain | 0.0042   | 0.0045   | 0.0045   | 0.0045   | 0.0052   | 0.0042   | 0.0045   | 0.0045   |
| $g_y$ strain | 0.0129   | 0.028    | 0.028    | 0.028    | 0.020    | 0.019    | 0.028    | 0.028    |
| $g_z$ strain | 0        | 0        | 0        | 0        | 0        | 0        | 0        | 0        |
| $A_x$ (MHz)  | 301      | 245      | 270      | 295      | 285      | 275      | 280      | 298      |
| $A_y$ (MHz)  | 348      | 385      | 365      | 365      | 360      | 350      | 350      | 350      |
| $A_z$ (MHz)  | 53       | 60       | 60       | 50       | 50       | 70       | 50       | 50       |

\*Changes in  $A$ -strain resulted in no change in the simulated spectrum.

**Table S6.** Spin Hamiltonian parameters for **1-6** in toluene collected at 100 K by CW X-band EPR. The standard errors for these parameters were not available from the simulating process.

| Complex     | 1     | 2     | 3     | 4     | 5     | 6     |
|-------------|-------|-------|-------|-------|-------|-------|
| $g_x$       | 1.940 | 1.928 | 1.935 | 1.928 | 1.932 | 1.928 |
| $g_y$       | 1.932 | 1.935 | 1.932 | 1.925 | 1.925 | 1.925 |
| $g_z$       | 1.992 | 1.990 | 1.985 | 1.981 | 1.983 | 1.980 |
| $A_x$ (MHz) | 290   | 300   | 285   | 285   | 285   | 290   |
| $A_y$ (MHz) | 345   | 345   | 365   | 363   | 363   | 370   |
| $A_z$ (MHz) | 55    | 60    | 60    | 60    | 60    | 65    |
| LWPP        | 4     | 4     | 4     | 4     | 4     | 4     |

**Table S7.** Spin Hamiltonian parameters for **2-6** in toluene collected at 298 K by CW X-band EPR. The standard errors for these parameters were not available from the simulating process.

| Complex            | <b>2</b> | <b>3</b> | <b>4</b> | <b>5</b> | <b>6</b> |
|--------------------|----------|----------|----------|----------|----------|
| $g_x$              | 1.923    | 1.925    | 1.930    | 1.920    | 1.920    |
| $g_y$              | 1.940    | 1.940    | 1.935    | 1.940    | 1.942    |
| $g_z$              | 1.991    | 1.986    | 1.981    | 1.982    | 1.990    |
| $A_x$ (MHz)        | 300      | 305      | 300      | 305      | 310      |
| $A_y$ (MHz)        | 350      | 355      | 350      | 350      | 350      |
| $A_z$ (MHz)        | 60       | 60       | 60       | 60       | 60       |
| $\tau_{corr}$ (ps) | 402      | 420      | 418      | 415      | 427      |

**Table S8.** Fit  $T_1$  values from the fitting function:  $I(\tau) = I(0) - Ae^{-\left(\frac{\tau}{T_1}\right)^\beta}$ . The standard error for each fit is reported in parentheses.

**1** in  $d^{14}$ -*o*-terphenyl:

| T (K) | $T_1$ (ms) | T (K) | $T_1$ (ms) |
|-------|------------|-------|------------|
| 4     | 1.23(6)    | 15    | 0.26(1)    |
| 5     | 1.15(3)    | 20    | 0.09(1)    |
| 10    | 0.43(1)    |       |            |

**2** in  $d^{14}$ -*o*-terphenyl:

| T (K) | $T_1$ (ms) | T (K) | $T_1$ (ms) |
|-------|------------|-------|------------|
| 5     | 0.24(2)    | 15    | 0.12(1)    |
| 10    | 0.23(5)    | 20    | 0.079(2)   |
| 12    | 0.17(6)    |       |            |

**3** in  $d^{14}$ -*o*-terphenyl:

| T (K) | $T_1$ (ms) | T (K) | $T_1$ (ms) |
|-------|------------|-------|------------|
| 5     | 0.59(1)    | 15    | 0.14(7)    |
| 10    | 0.24(3)    | 20    | 0.09(5)    |
| 12    | 0.20(7)    |       |            |

**4** in  $d^{14}$ -*o*-terphenyl:

| T (K) | $T_1$ (ms) | T (K) | $T_1$ (ms) |
|-------|------------|-------|------------|
| 5     | 0.63(1)    | 15    | 0.13(2)    |
| 10    | 0.65(2)    | 20    | 0.08(5)    |
| 12    | 0.26(1)    |       |            |

**5** in  $d^{14}$ -*o*-terphenyl:

| T (K) | $T_1$ (ms) | T (K) | $T_1$ (ms) |
|-------|------------|-------|------------|
| 5     | 0.56(4)    | 15    | 0.14(2)    |
| 10    | 0.30(2)    | 20    | 0.09(2)    |
| 12    | 0.21(3)    |       |            |

**6** in  $d^{14}$ -*o*-terphenyl:

| T (K) | $T_1$ (ms) | T (K) | $T_1$ (ms) |
|-------|------------|-------|------------|
| 5     | 0.46(4)    | 15    | 0.13(3)    |
| 10    | 0.37(5)    | 20    | 0.08(3)    |
| 12    | 0.18(2)    |       |            |

**7** in  $d^{14}$ -*o*-terphenyl:

| T (K) | $T_1$ (ms) | T (K) | $T_1$ (ms) |
|-------|------------|-------|------------|
| 5     | 0.57(6)    | 15    | 0.15(3)    |
| 10    | 0.22(4)    |       |            |
| 12    | 0.19(2)    |       |            |

**8** in  $d^{14}$ -*o*-terphenyl:

| T (K) | $T_1$ (ms) | T (K) | $T_1$ (ms) |
|-------|------------|-------|------------|
| 5     | 1.55(2)    | 15    | 0.32(3)    |
| 10    | 1.08(5)    | 20    | 0.12(3)    |
| 12    | 0.62(4)    |       |            |

**Table S9.** Fit parameters for the temperature dependence of  $T_1$ ; see "EPR measurements" section for fitting equation. The standard error for each fit is reported in parentheses.

| Complex  | $A_{\text{dir}} (\text{K}^{-1} \text{s}^{-1} \text{T}^{-2})$ | $A_{\text{ram}} (\text{s}^{-1})$ |
|----------|--------------------------------------------------------------|----------------------------------|
| <b>1</b> | $6.01(3) \times 10^{-4}$                                     | $4.76(5) \times 10^{-12}$        |
| <b>2</b> | $1.36(1) \times 10^{-3}$                                     | $9.18(6) \times 10^{-12}$        |
| <b>3</b> | $1.13(4) \times 10^{-3}$                                     | $7.57(2) \times 10^{-12}$        |
| <b>4</b> | $9.98(2) \times 10^{-4}$                                     | $2.37(2) \times 10^{-11}$        |
| <b>5</b> | $1.10(4) \times 10^{-3}$                                     | $1.93(3) \times 10^{-11}$        |
| <b>6</b> | $1.13(1) \times 10^{-3}$                                     | $1.78(8) \times 10^{-11}$        |

\*Values for B and n were fixed.



**Table S10.** Fit  $T_m$  values (in  $\mu\text{s}$ ) and the stretch parameters ( $\beta$ ) from the stretched exponential fitting function:  $I(2\tau) = I(0) - Ae^{\left(\frac{2\tau}{T_m}\right)^\beta}$ . The standard error for each fit is reported in parentheses.

| <b>1 in <math>d^{14}</math>-<i>o</i>-terphenyl:</b> |                         |         |      |                         |         |
|-----------------------------------------------------|-------------------------|---------|------|-------------------------|---------|
| T (K)                                               | $T_m$ ( $\mu\text{s}$ ) | $\beta$ | T(K) | $T_m$ ( $\mu\text{s}$ ) | $\beta$ |
| 4                                                   | 5.44(2)                 | 0.66(2) | 15   | 2.81(4)                 | 0.80(1) |
| 5                                                   | 4.82(3)                 | 0.68(3) | 20   | 2.45(4)                 | 0.86(2) |
| 6                                                   | 4.56(2)                 | 0.70(3) | 25   | 2.14(4)                 | 0.91(2) |
| 8                                                   | 3.92(3)                 | 0.74(4) | 30   | 1.86(3)                 | 0.94(2) |
| 10                                                  | 3.39(3)                 | 0.77(6) |      |                         |         |

  

| <b>2 in <math>d^{14}</math>-<i>o</i>-terphenyl:</b> |                         |         |      |                         |         |
|-----------------------------------------------------|-------------------------|---------|------|-------------------------|---------|
| T (K)                                               | $T_m$ ( $\mu\text{s}$ ) | $\beta$ | T(K) | $T_m$ ( $\mu\text{s}$ ) | $\beta$ |
| 5                                                   | 3.91(7)                 | 0.64(8) | 20   | 2.07(2)                 | 0.83(1) |
| 6                                                   | 3.67(4)                 | 0.68(5) | 25   | 1.89(2)                 | 0.86(1) |
| 8                                                   | 3.25(3)                 | 0.72(5) | 30   | 1.71(2)                 | 0.87(1) |
| 12                                                  | 2.82(4)                 | 0.73(1) | 40   | 1.41(3)                 | 0.92(2) |
| 15                                                  | 2.31(6)                 | 0.92(3) | 60   | 0.74(7)                 | 0.77(7) |

  

| <b>3 in <math>d^{14}</math>-<i>o</i>-terphenyl:</b> |                         |         |      |                         |         |
|-----------------------------------------------------|-------------------------|---------|------|-------------------------|---------|
| T (K)                                               | $T_m$ ( $\mu\text{s}$ ) | $\beta$ | T(K) | $T_m$ ( $\mu\text{s}$ ) | $\beta$ |
| 5                                                   | 4.54(6)                 | 0.66(1) | 15   | 2.78(1)                 | 0.72(3) |
| 7                                                   | 4.01(7)                 | 0.68(1) | 20   | 2.37(9)                 | 0.76(3) |
| 8                                                   | 3.74(9)                 | 0.70(2) | 25   | 2.07(8)                 | 1.05(6) |
| 10                                                  | 3.23(6)                 | 0.69(1) | 30   | 2.41(9)                 | 1.30(1) |
| 12                                                  | 3.03(6)                 | 0.70(1) |      |                         |         |

  

| <b>4 in <math>d^{14}</math>-<i>o</i>-terphenyl:</b> |                         |         |      |                         |         |
|-----------------------------------------------------|-------------------------|---------|------|-------------------------|---------|
| T (K)                                               | $T_m$ ( $\mu\text{s}$ ) | $\beta$ | T(K) | $T_m$ ( $\mu\text{s}$ ) | $\beta$ |
| 5                                                   | 4.33(4)                 | 0.63(5) | 15   | 2.53(4)                 | 0.72(1) |
| 7                                                   | 3.88(4)                 | 0.67(5) | 20   | 2.27(4)                 | 0.75(2) |
| 8                                                   | 3.69(4)                 | 0.68(6) | 25   | 2.01(4)                 | 0.78(2) |
| 10                                                  | 3.13(4)                 | 0.71(8) | 30   | 2.06(5)                 | 0.83(3) |
| 12                                                  | 2.85(5)                 | 0.72(1) | 40   | 1.73(6)                 | 0.74(2) |

  

| <b>5 in <math>d^{14}</math>-<i>o</i>-terphenyl:</b> |                         |         |      |                         |         |
|-----------------------------------------------------|-------------------------|---------|------|-------------------------|---------|
| T (K)                                               | $T_m$ ( $\mu\text{s}$ ) | $\beta$ | T(K) | $T_m$ ( $\mu\text{s}$ ) | $\beta$ |
| 5                                                   | 4.17(2)                 | 0.68(3) | 20   | 2.11(1)                 | 0.82(6) |
| 7                                                   | 3.57(2)                 | 0.70(4) | 25   | 1.85(1)                 | 0.85(6) |
| 8                                                   | 3.61(2)                 | 0.88(5) | 30   | 1.72(2)                 | 0.91(7) |
| 10                                                  | 2.95(1)                 | 0.74(4) | 40   | 1.44(3)                 | 0.96(1) |
| 12                                                  | 2.67(1)                 | 0.77(5) | 50   | 1.14(1)                 | 0.99(1) |
| 15                                                  | 2.36(3)                 | 0.80(7) |      |                         |         |

**6** in  $d^{14}$ -*o*-terphenyl:

| T (K) | $T_m$ ( $\mu$ s) | $\beta$ | T(K) | $T_m$ ( $\mu$ s) | $\beta$ |
|-------|------------------|---------|------|------------------|---------|
| 5     | 3.84(3)          | 0.64(4) | 20   | 2.19(2)          | 0.78(8) |
| 7     | 3.50(2)          | 0.66(4) | 25   | 1.97(2)          | 0.79(1) |
| 8     | 3.42(6)          | 0.67(1) | 30   | 1.83(3)          | 0.77(1) |
| 10    | 3.07(3)          | 0.70(5) | 40   | 1.52(3)          | 0.79(2) |
| 12    | 2.67(2)          | 0.72(5) |      |                  |         |
| 15    | 2.47(2)          | 0.76(6) |      |                  |         |

**7** in  $d^{14}$ -*o*-terphenyl:

| T (K) | $T_m$ ( $\mu$ s) | $\beta$ | T(K) | $T_m$ ( $\mu$ s) | $\beta$ |
|-------|------------------|---------|------|------------------|---------|
| 5     | 3.62(4)          | 0.64(3) | 20   | 1.72(8)          | 1.00(3) |
| 8     | 3.00(2)          | 0.74(8) | 25   | 1.61(6)          | 1.02(4) |
| 10    | 2.70(1)          | 0.82(1) | 30   | 1.46(4)          | 1.05(4) |
| 12    | 2.28(5)          | 0.84(2) |      |                  |         |
| 15    | 2.07(5)          | 0.92(4) |      |                  |         |

**8** in  $d^{14}$ -*o*-terphenyl:

| T (K) | $T_m$ ( $\mu$ s) | $\beta$ | T(K) | $T_m$ ( $\mu$ s) | $\beta$ |
|-------|------------------|---------|------|------------------|---------|
| 5     | 4.04(6)          | 1.08(2) | 20   | 1.93(2)          | 1.09(1) |
| 8     | 3.32(8)          | 1.08(3) |      |                  |         |
| 10    | 2.91(9)          | 1.09(4) |      |                  |         |
| 12    | 2.65(9)          | 1.10(5) |      |                  |         |
| 15    | 2.30(1)          | 1.09(6) |      |                  |         |

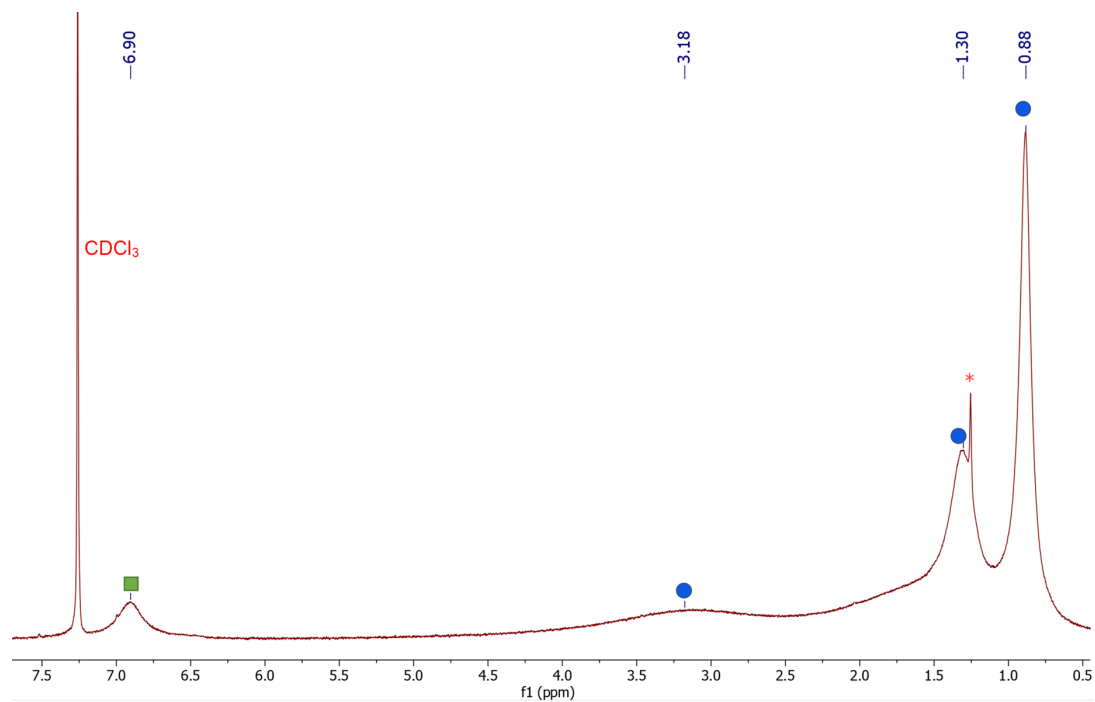

**Figure S5.**  $^1\text{H}$  NMR spectrum of **2** in  $\text{CDCl}_3$ . No signal was observed outside this spectral range. Blue dots denote protons on the counterion, and the green square denote ligand protons. Asterisks denote impurities in the NMR solvent.

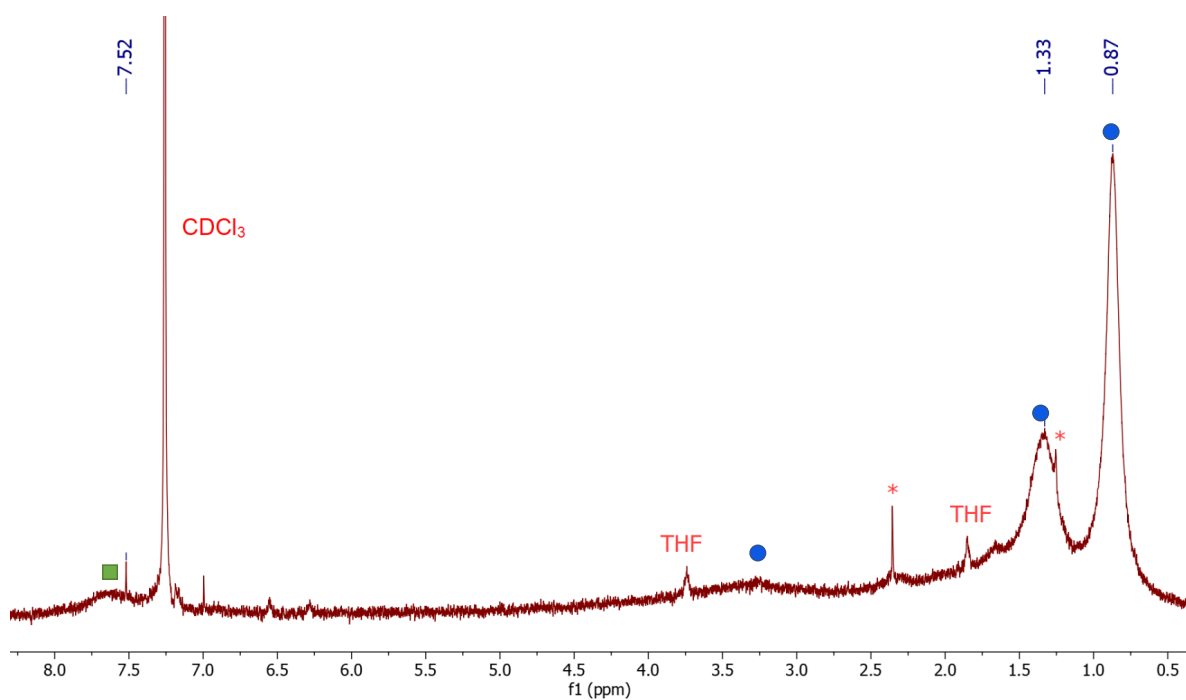

**Figure S6.**  $^1\text{H}$  NMR spectrum of **3** in  $\text{CDCl}_3$ . No signal was observed outside this spectral range. Blue dots denote protons on the counterion, and the green square denote ligand protons. Asterisks denote impurities in the NMR solvent.

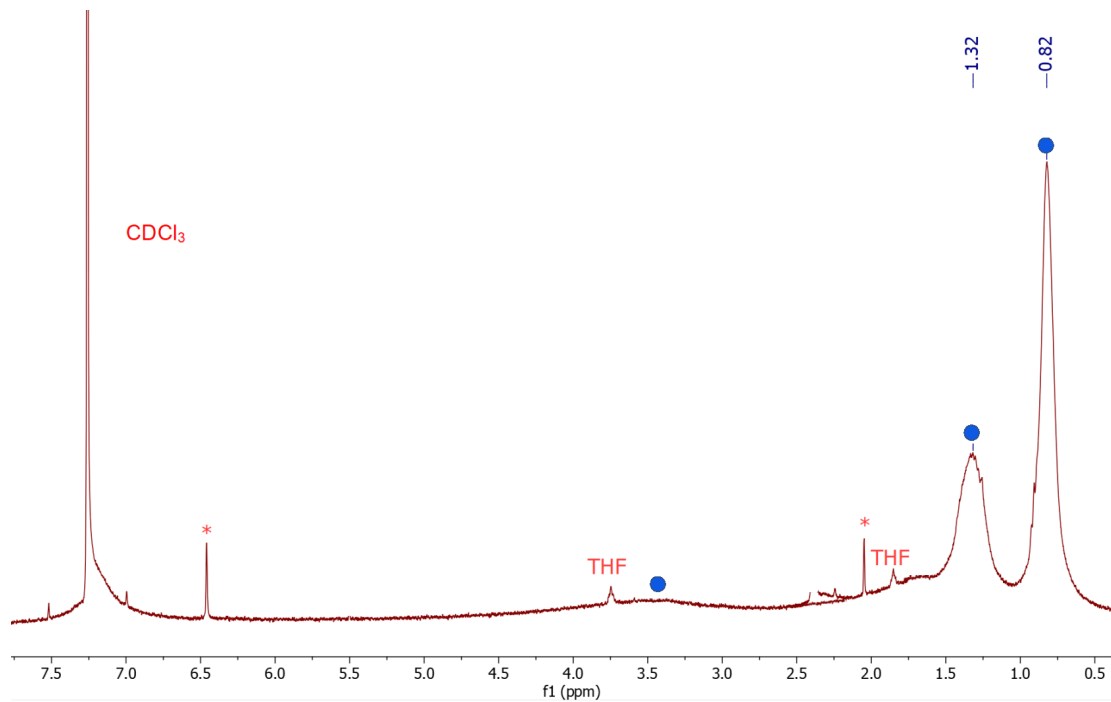

**Figure S7.**  $^1\text{H}$  NMR spectrum of **4** in  $\text{CDCl}_3$ . No signal was observed outside this spectral range. Blue dots denote protons on the counterion. Asterisks denote impurities in the NMR solvent.

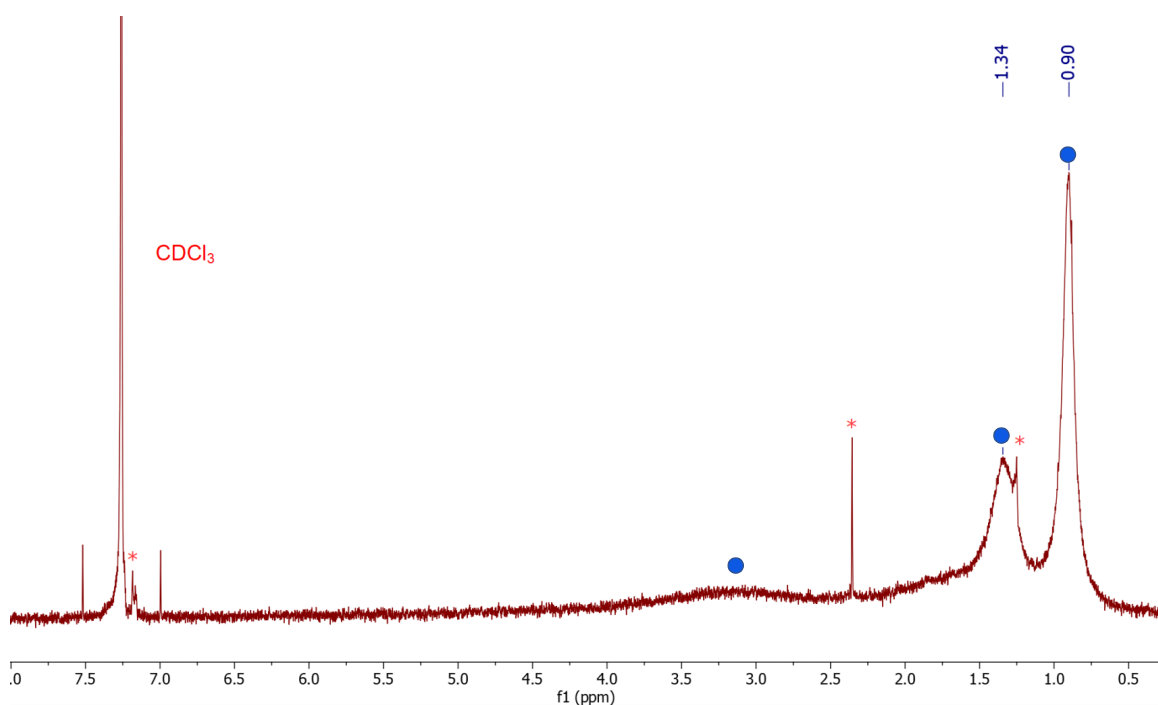

**Figure S8.**  $^1\text{H}$  NMR spectrum of **5** in  $\text{CDCl}_3$ . No signal was observed outside this spectral range. Blue dots denote protons on the counterion. Asterisks denote impurities in the NMR solvent.

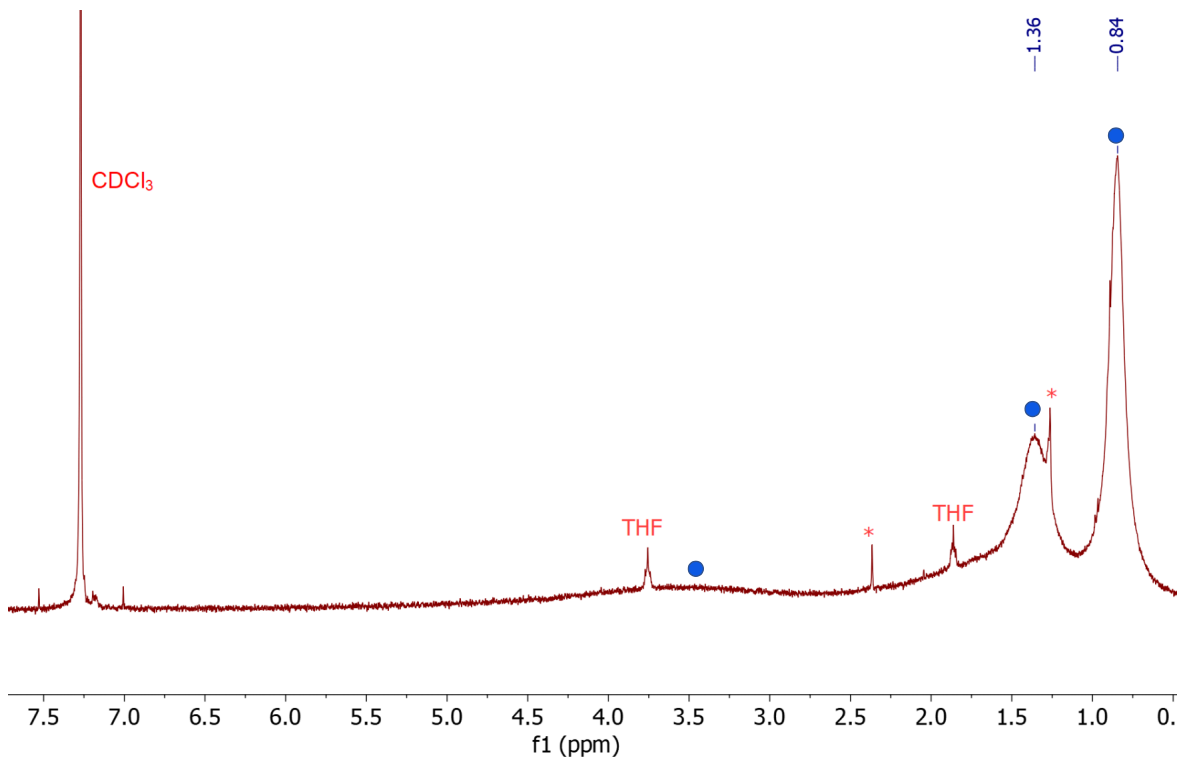

**Figure S9.**  $^1\text{H}$  NMR spectrum of **6** in  $\text{CDCl}_3$ . No signal was observed outside this spectral range. Blue dots denote protons on counterion. Asterisks denote impurities in the NMR solvent.

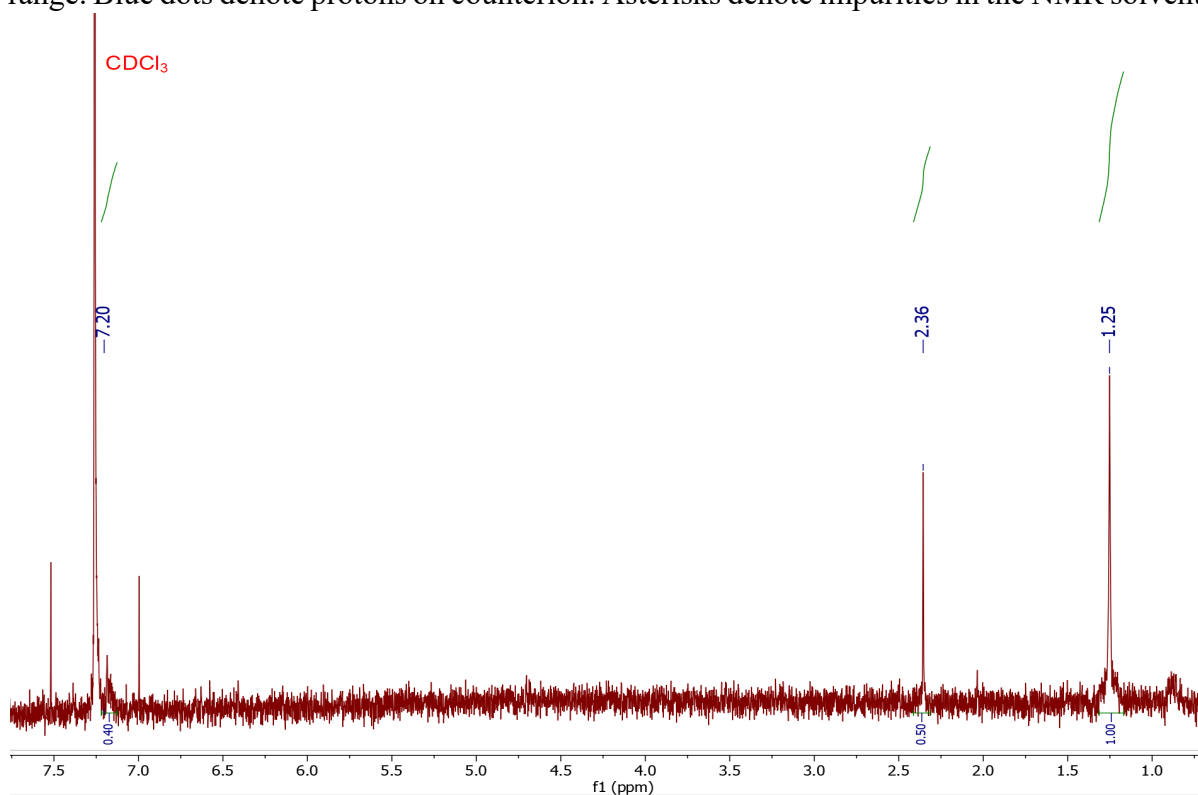

**Figure S10.**  $^1\text{H}$  NMR spectrum of  $\text{CDCl}_3$  used for collecting  $^1\text{H}$  NMR spectra of complexes. No signal was observed outside this spectral range. Numbered peaks correspond to solvent impurities.

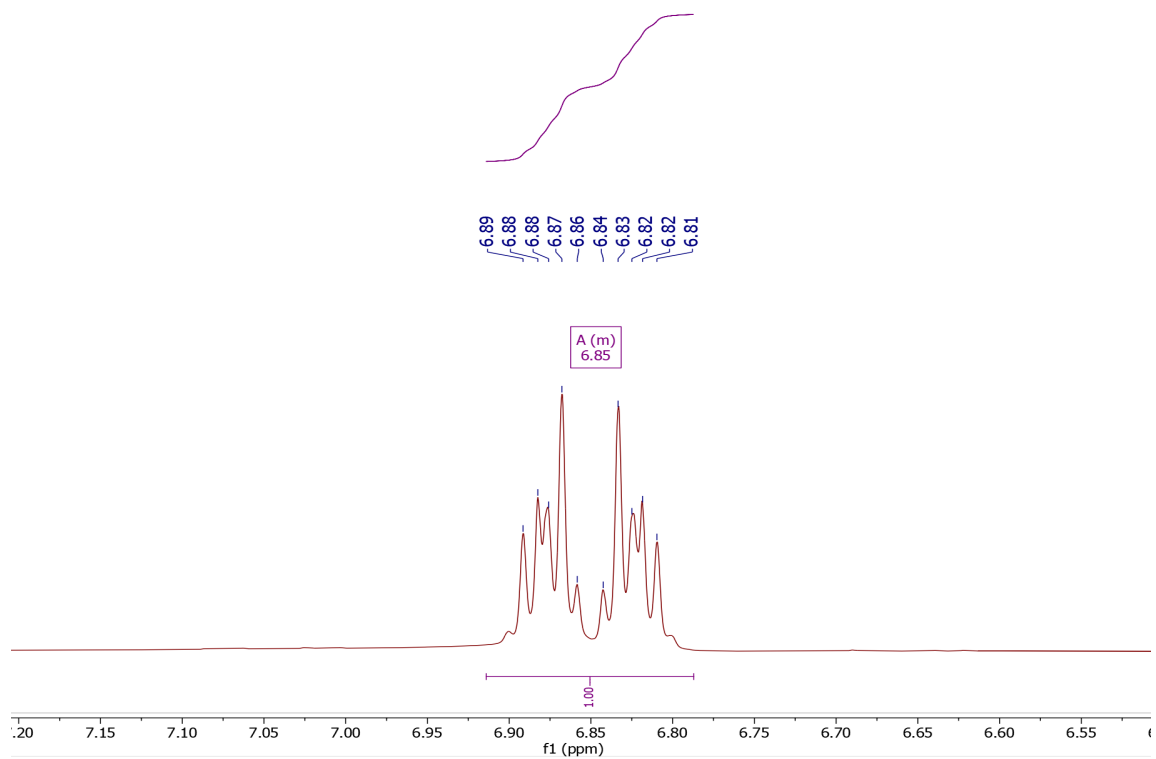

**Figure S11.**  $^1\text{H}$  NMR spectrum of catechol ligand in  $\text{CDCl}_3$ . No signal was observed outside this spectral range.

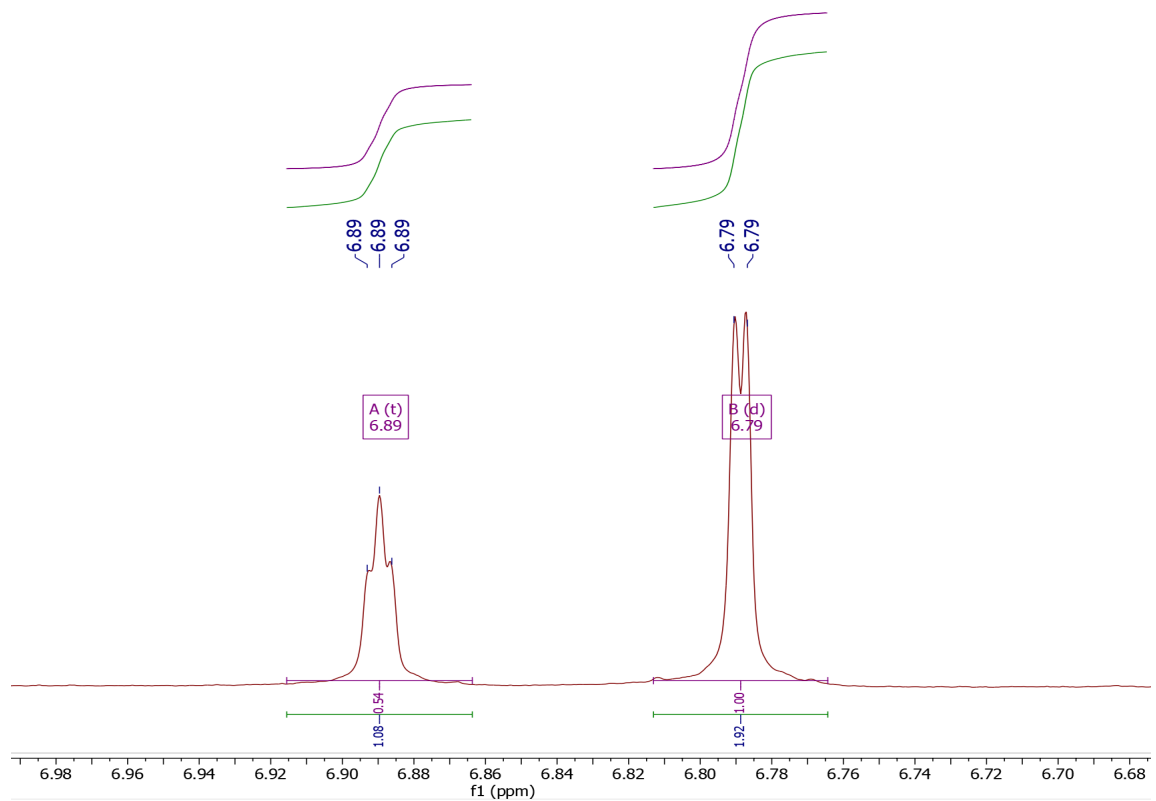

**Figure S12.**  $^1\text{H}$  NMR spectrum of 4-chlorocatechol ligand in  $\text{CDCl}_3$ . No signal was observed outside this spectral range.

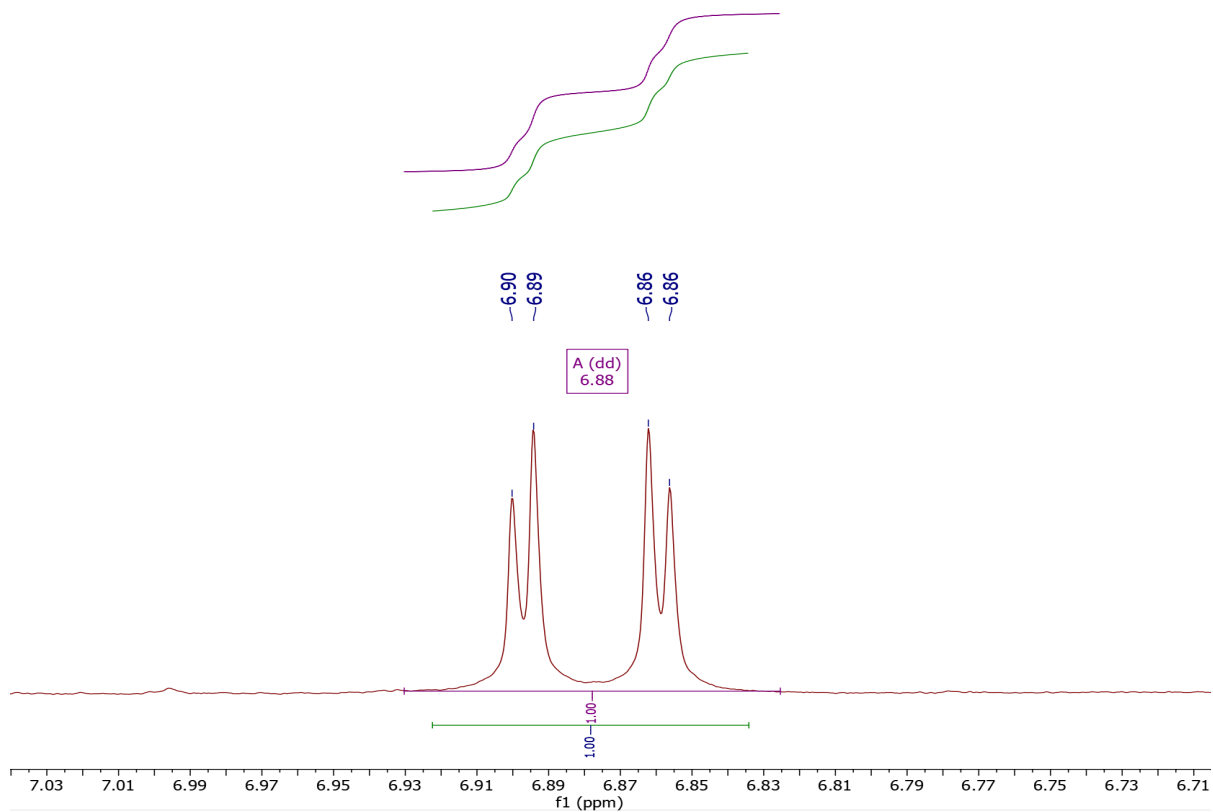

**Figure S13.**  $^1\text{H}$  NMR spectrum of 3,5-dichlorocatechol ligand in  $\text{CDCl}_3$ . No signal was observed outside this spectral range.

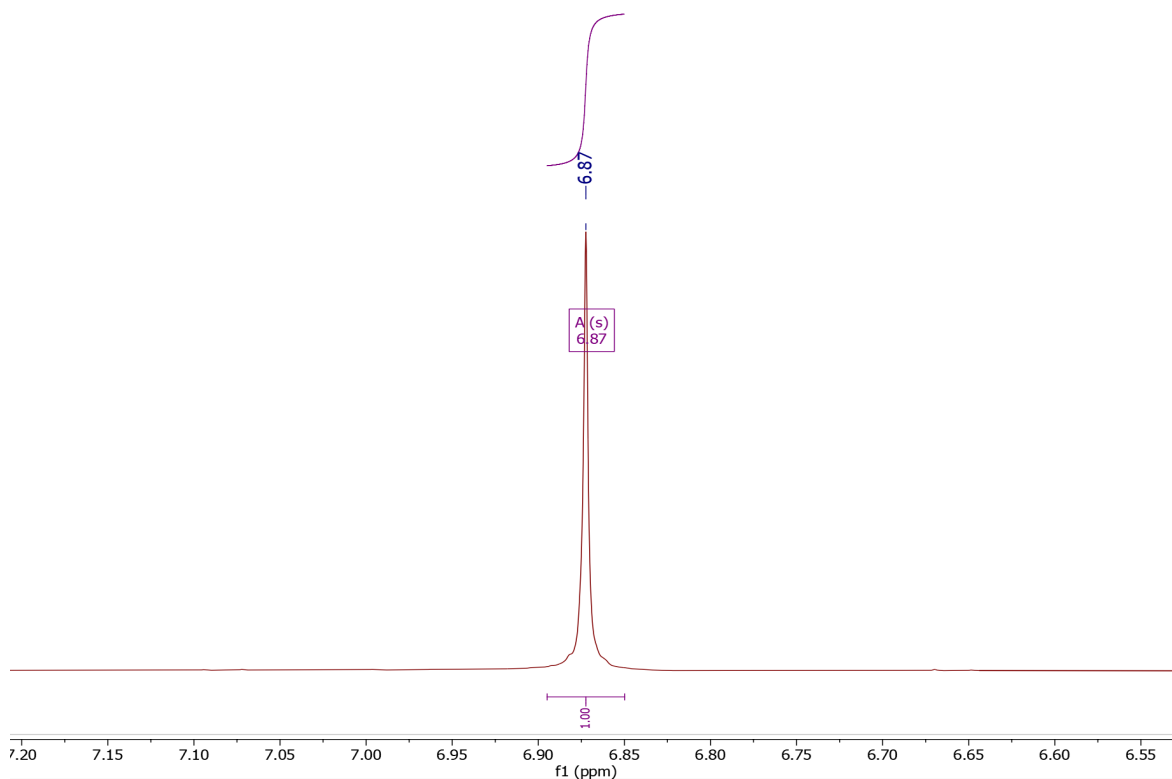

**Figure S14.**  $^1\text{H}$  NMR spectrum of 3,6-dichlorocatechol ligand in  $\text{CDCl}_3$ . No signal was observed outside this spectral range.

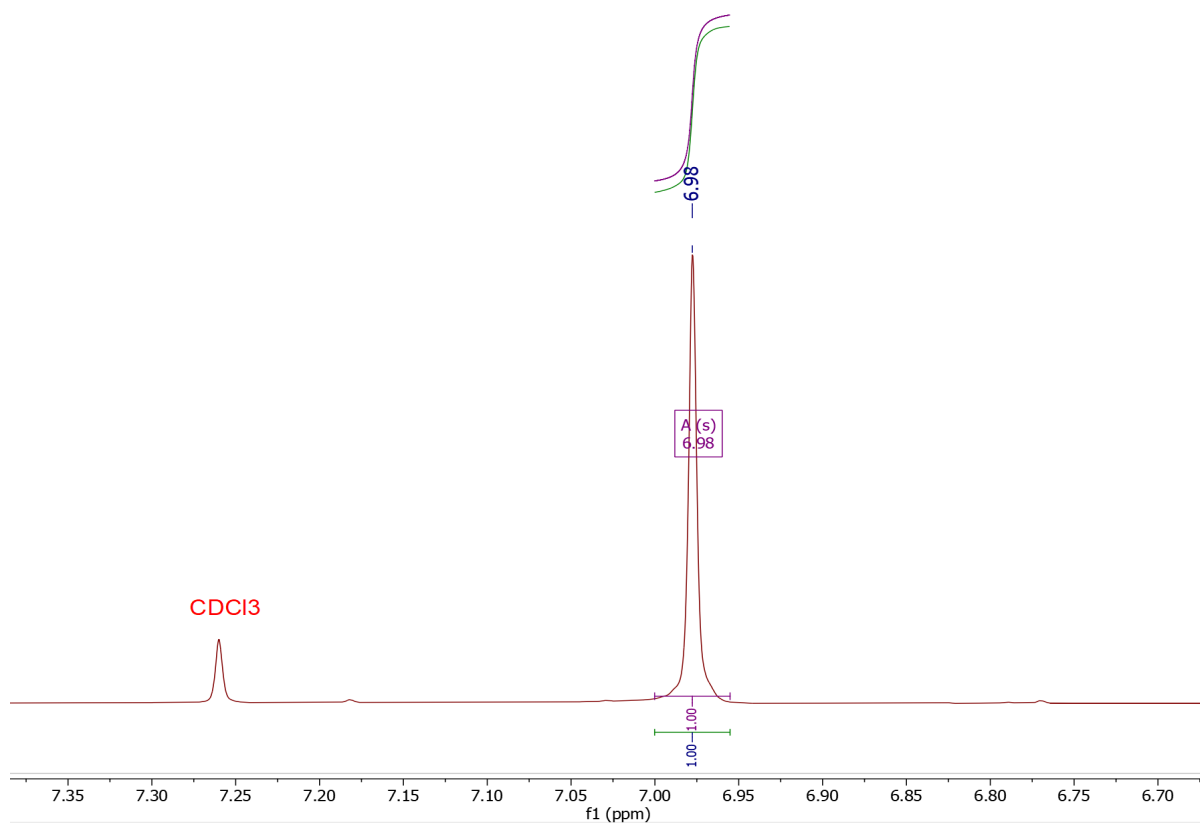

**Figure S15.** <sup>1</sup>H NMR spectrum of 4,5-dichlorocatechol ligand in  $\text{CDCl}_3$ . No signal was observed outside this spectral range.



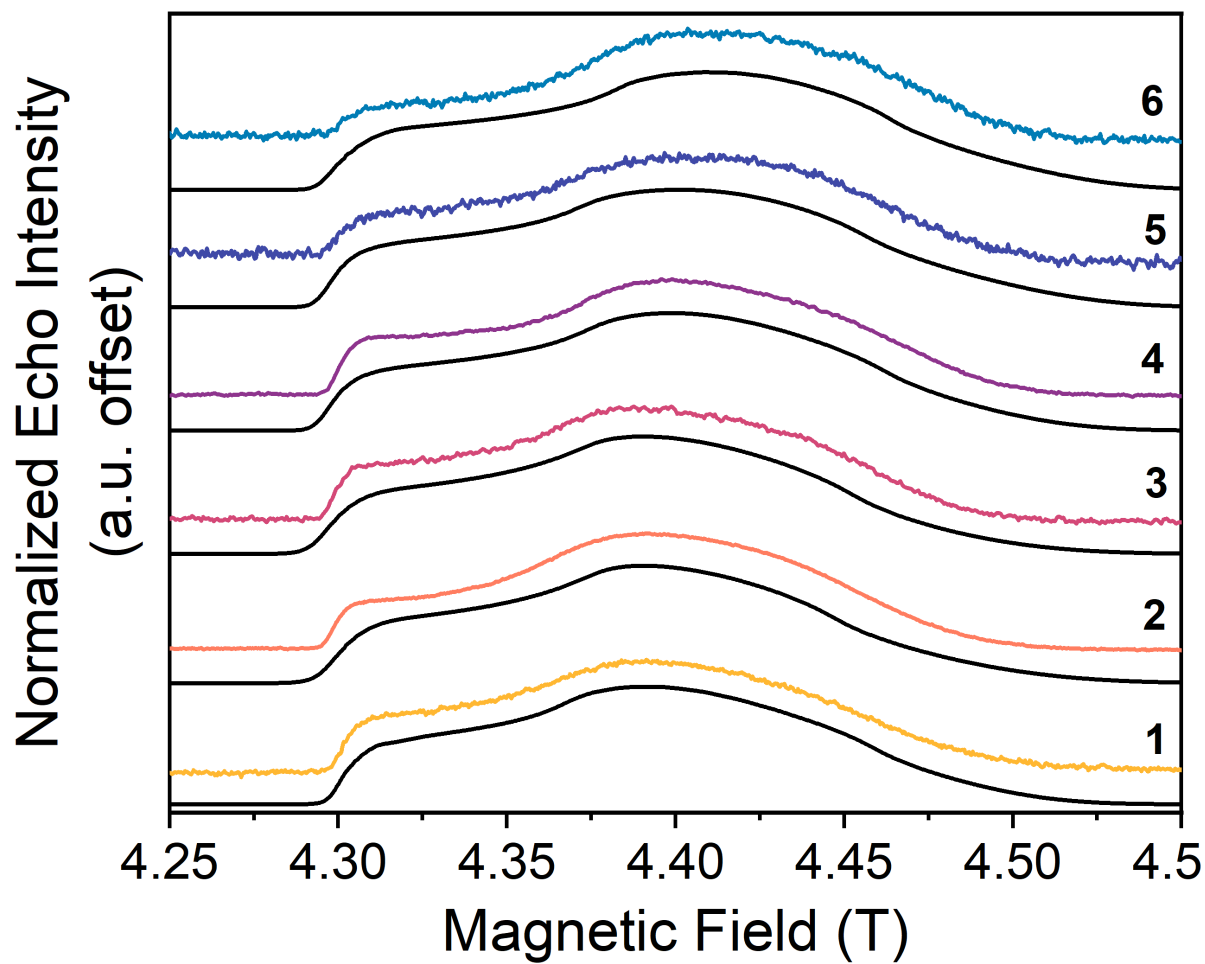

**Figure S16.** Echo-detected, field-swept spectra at 120 GHz of **1–6** in  $d^{14}$ -*o*-terphenyl solutions (color) at 5 K and simulations (black). Simulated spin Hamiltonian parameters are given in Table S4.

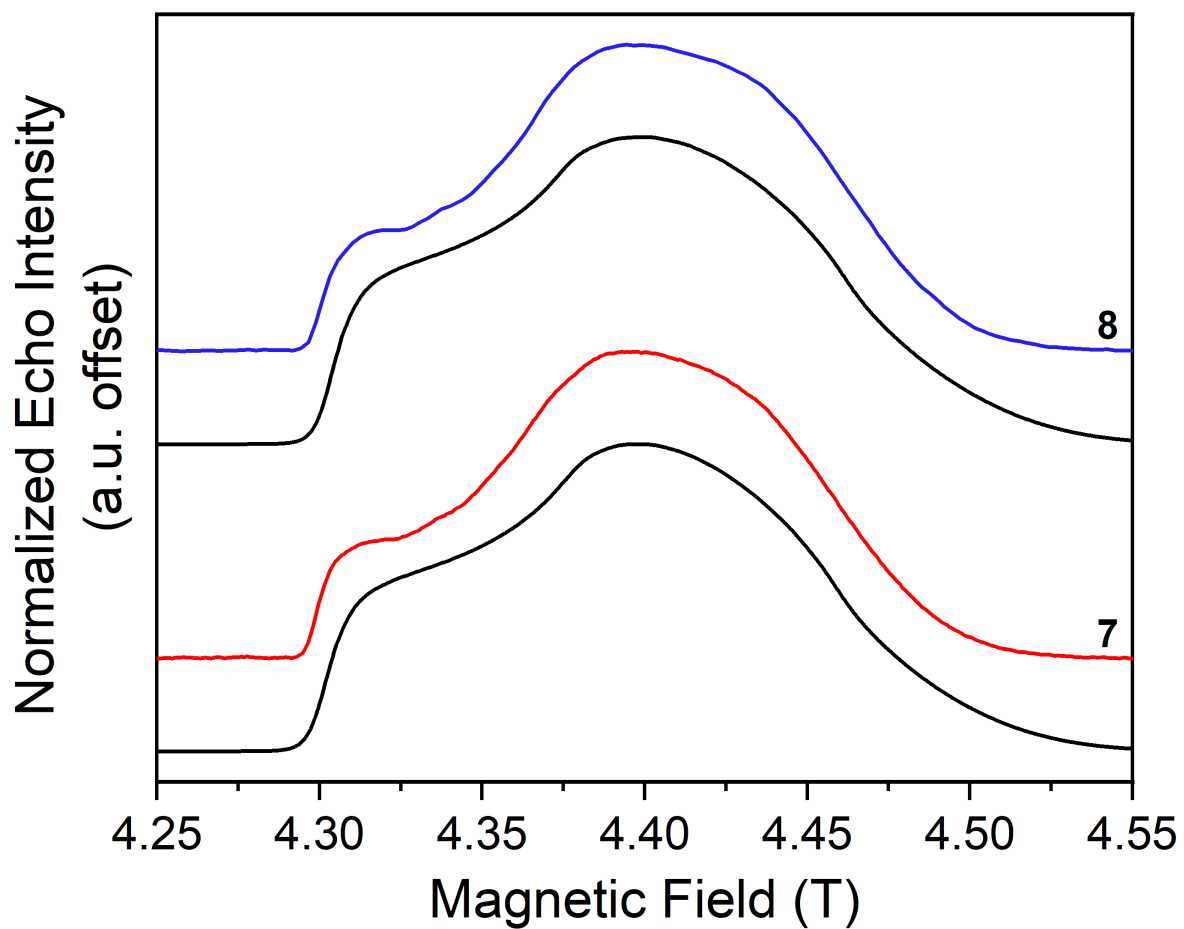

**Figure S17.** Echo-detected, field-swept spectra at 120 GHz of **7** and **8** in  $d^{14}$ -*o*-terphenyl solutions (color) at 5 K and simulations (black). Simulated spin Hamiltonian parameters are given in Table S4.

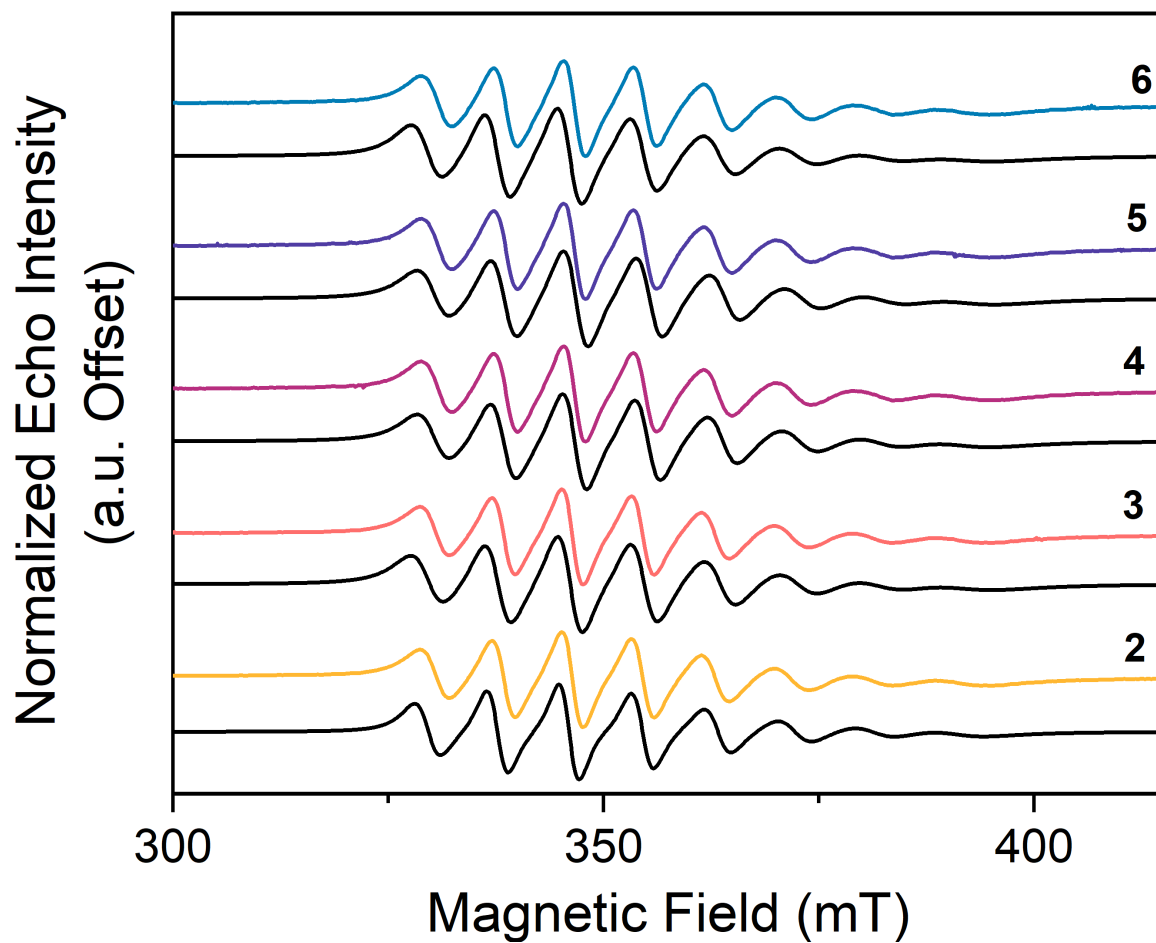

**Figure S18.** Continuous wave spectra at 9.4 GHz of **1–6** in toluene solutions (color) at 298 K and simulations (black). Simulated spin Hamiltonian parameters are given in Table S5.

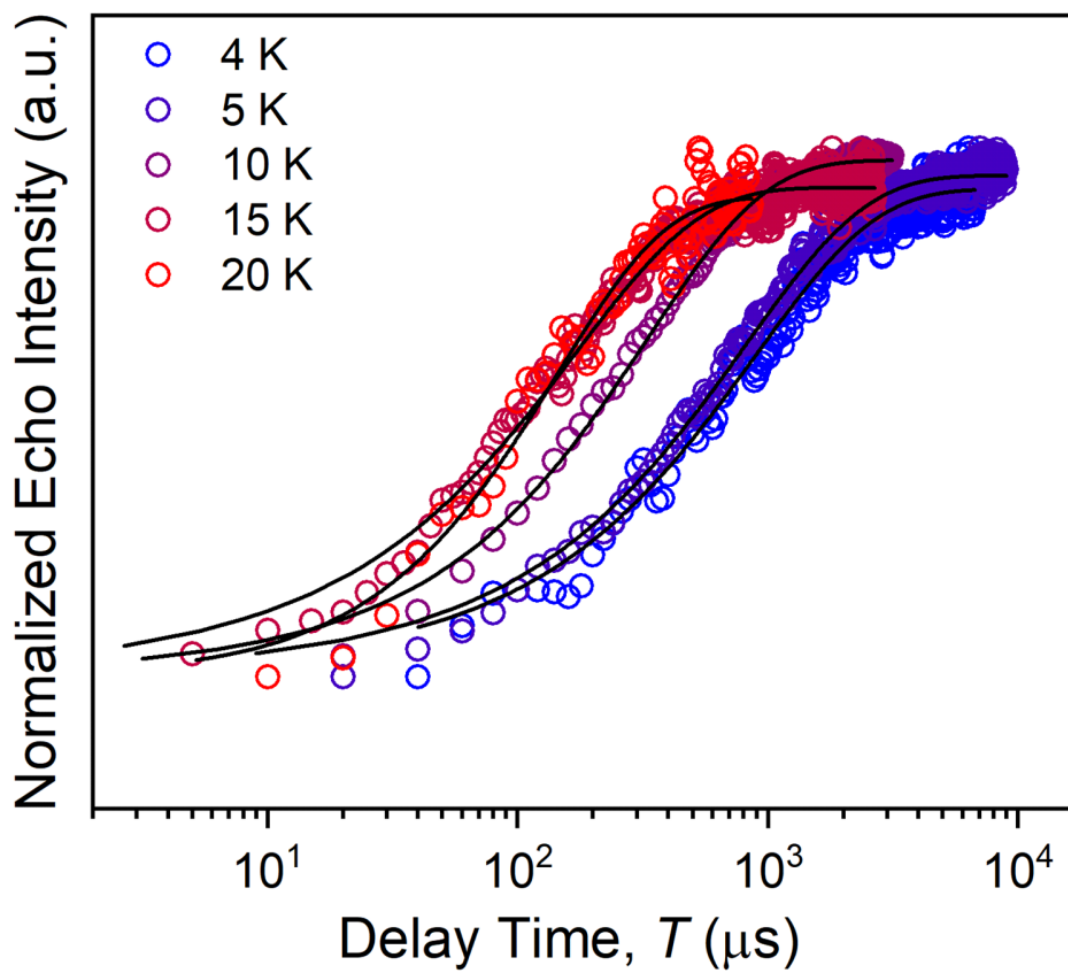

**Figure S19.** Selected variable temperature inversion recovery curves (color traces) and fits (black traces) for **1** in  $\text{d}^{14}$ -*o*-terphenyl.

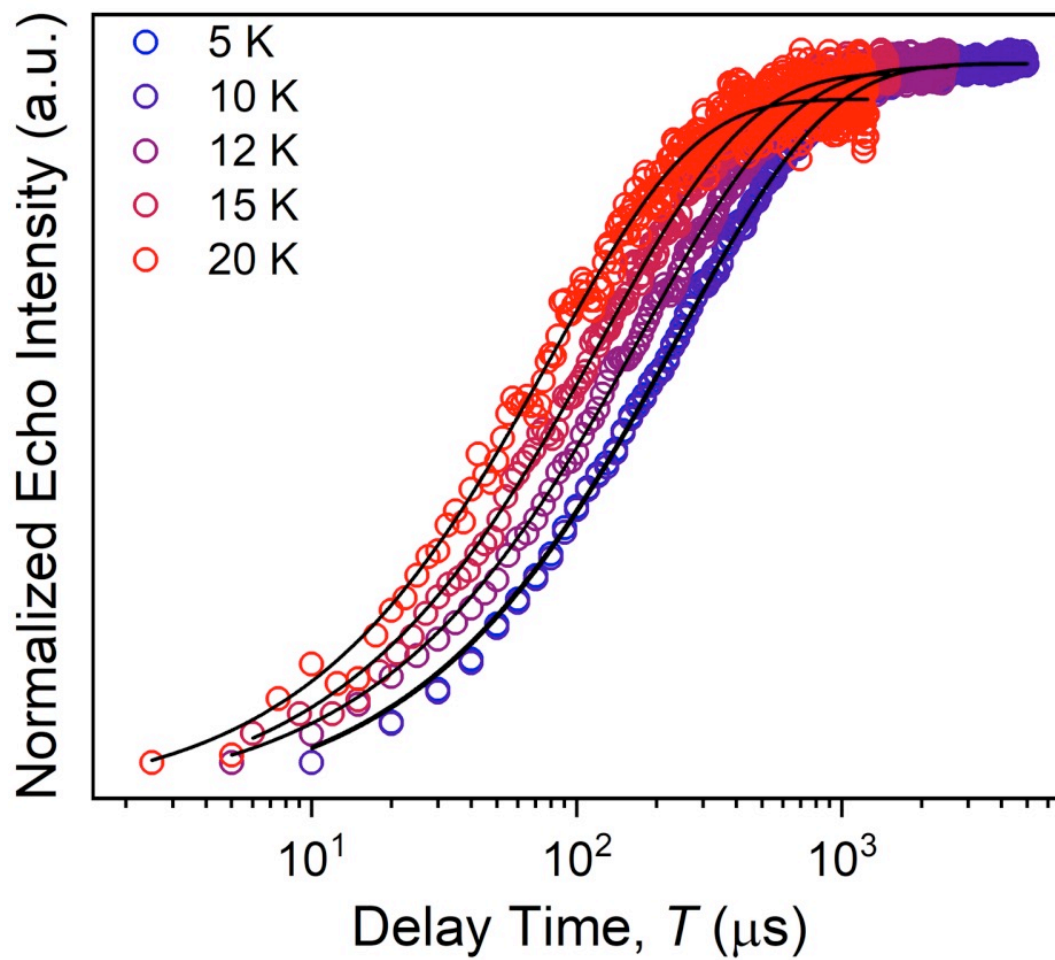

**Figure S20.** Selected variable temperature inversion recovery curves (color traces) and fits (black traces) for **2** in  $\text{d}^{14}$ -*o*-terphenyl.

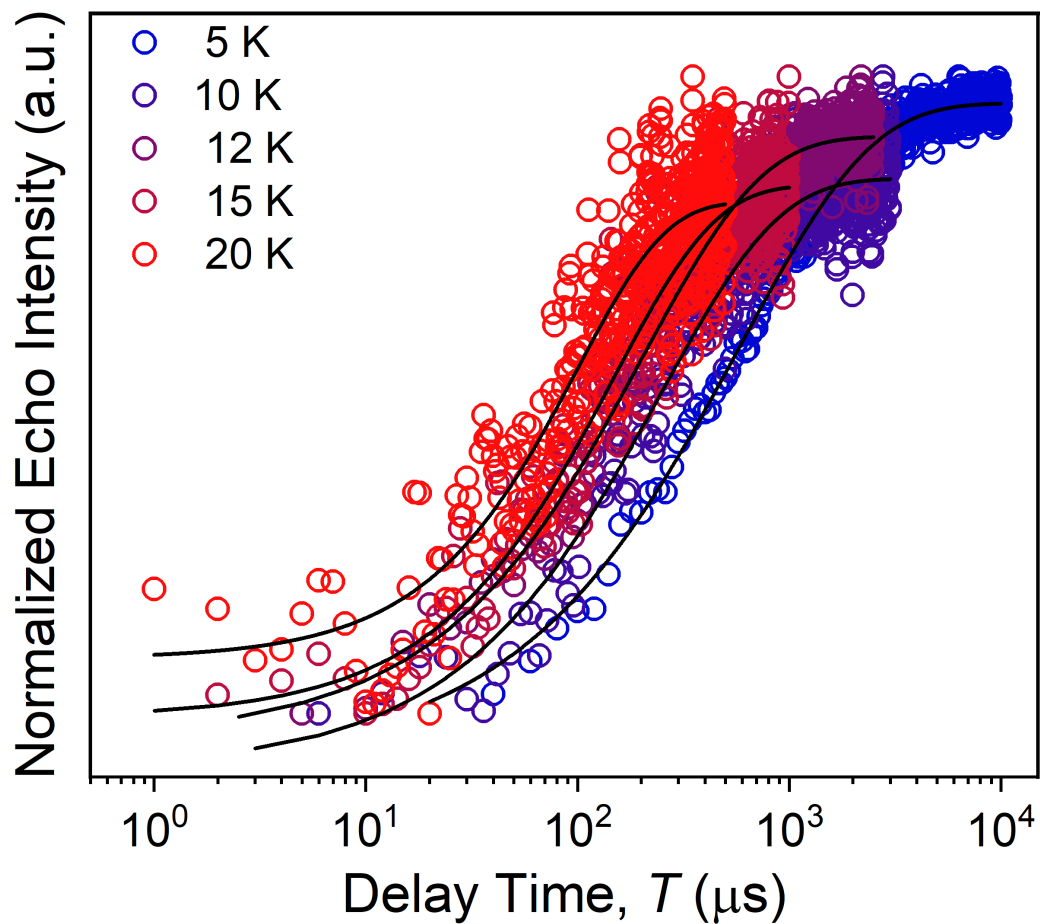

**Figure S21.** Selected variable temperature inversion recovery curves (color traces) and fits (black traces) for **3** in  $d^{14}$ -*o*-terphenyl.

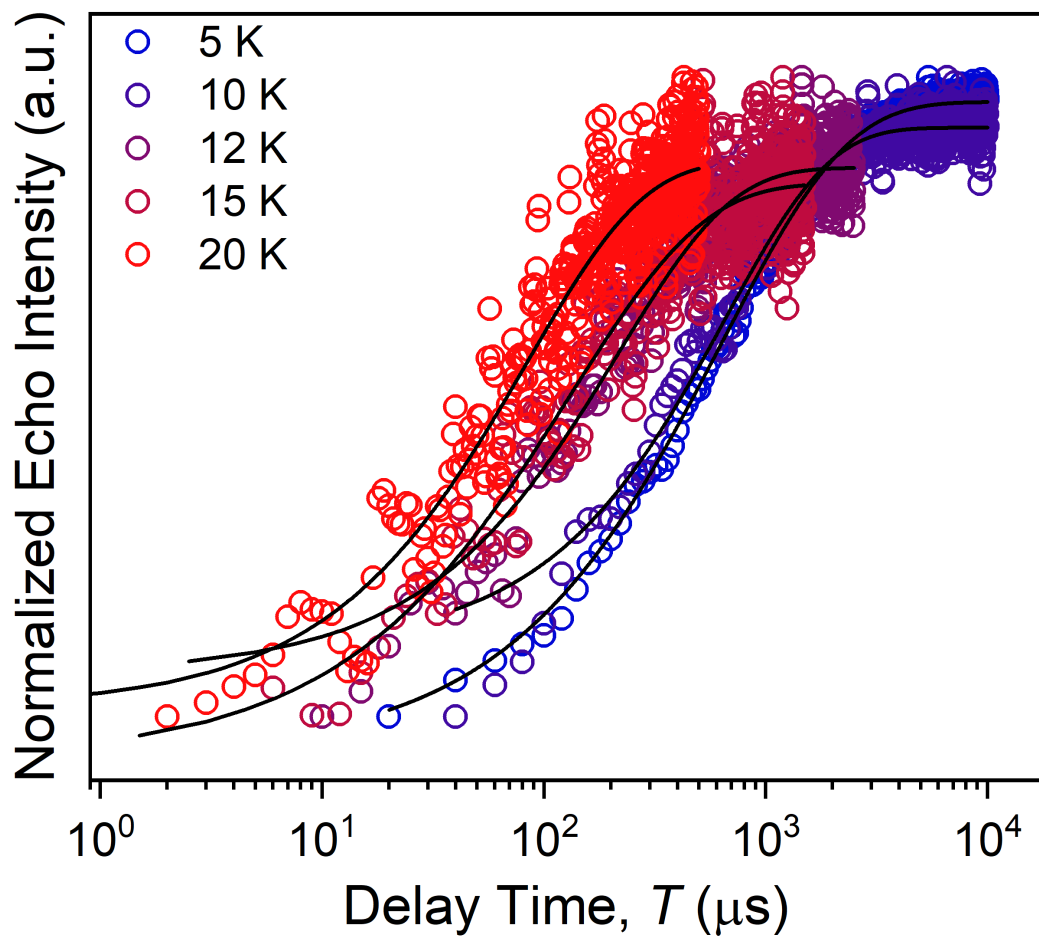

**Figure S22.** Selected variable temperature inversion recovery curves (color traces) and fits (black traces) for 4.

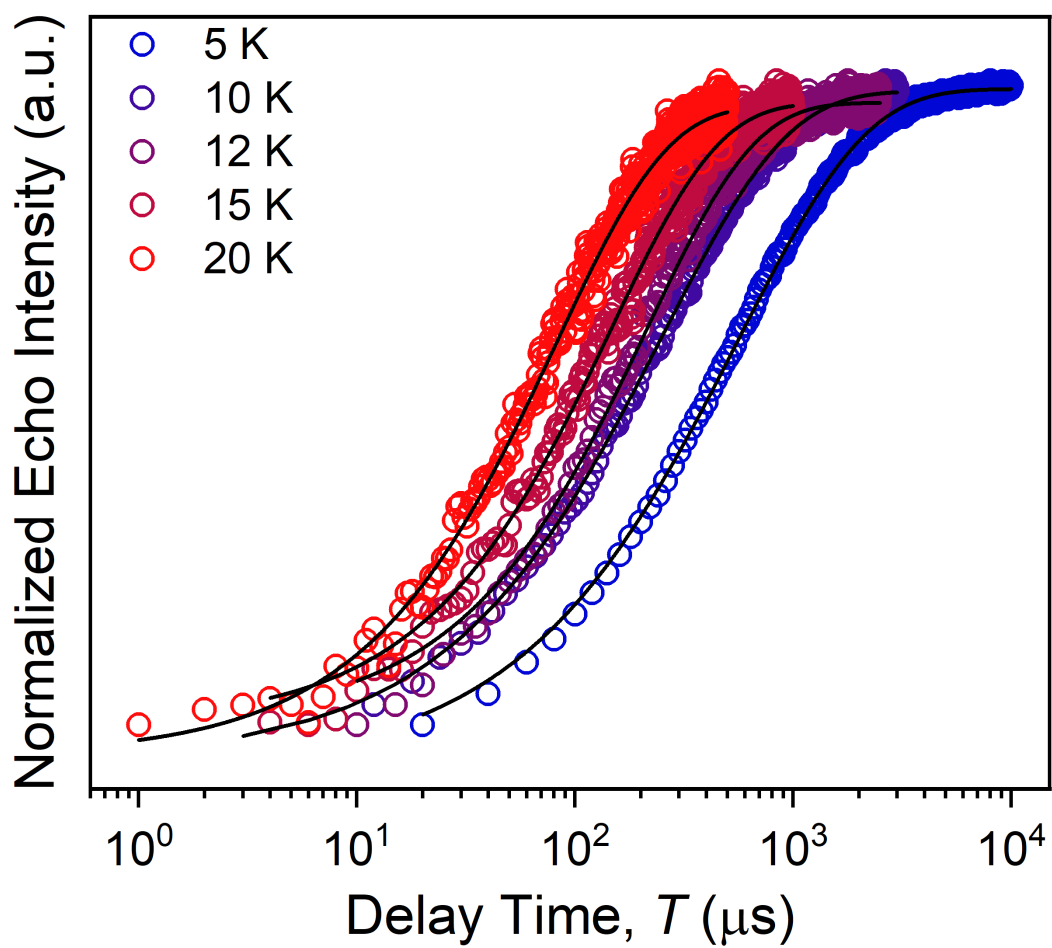

**Figure S23.** Selected variable temperature inversion recovery curves (color traces) and fits (black traces) for **5** in  $\text{d}^{14}\text{-}o\text{-terphenyl}$ .



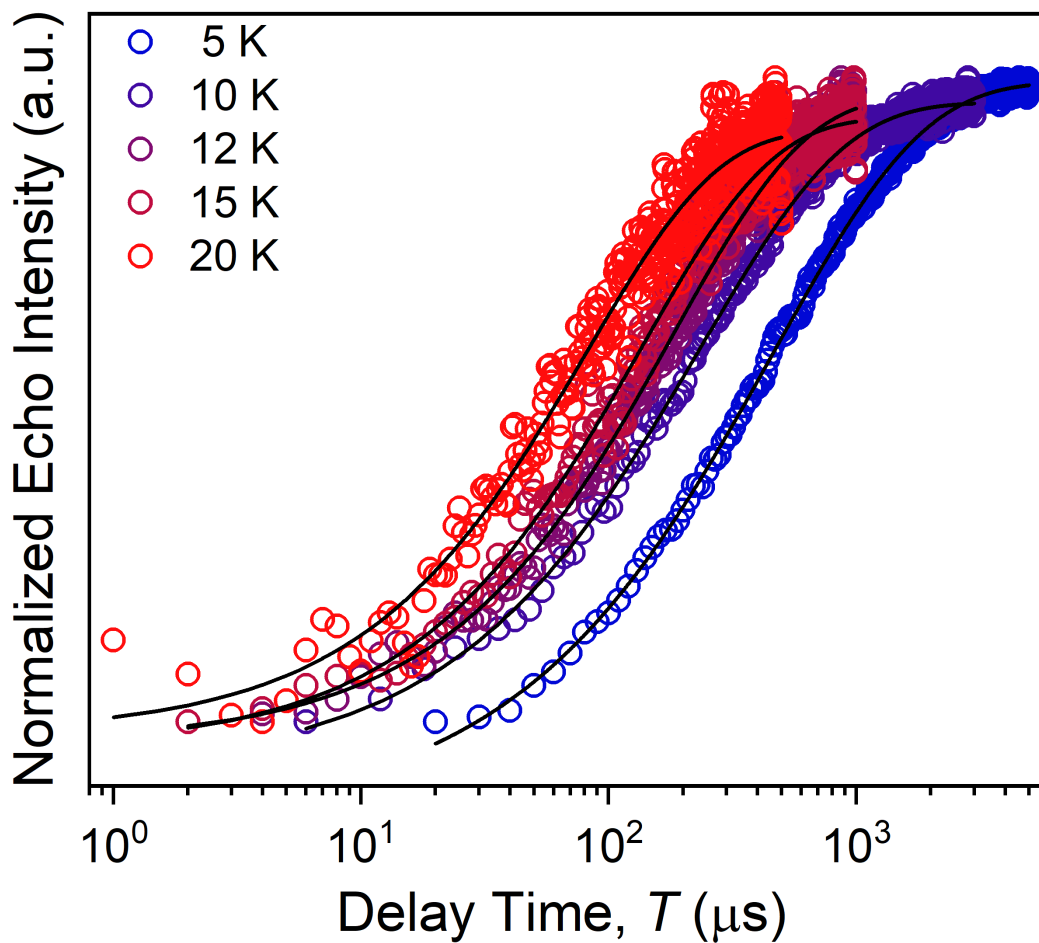

**Figure S24.** Selected variable temperature inversion recovery curves (color traces) and fits (black traces) for **6** in  $\text{d}^{14}$ -*o*-terphenyl.

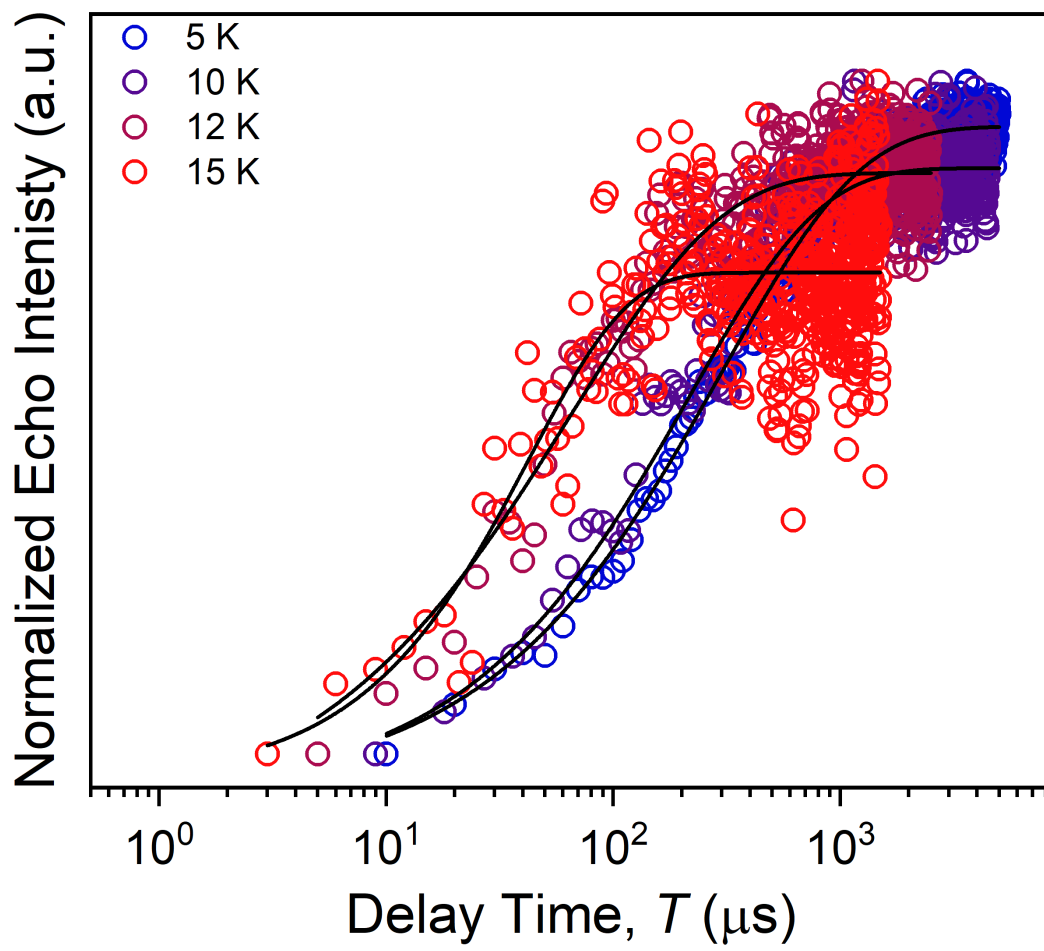

**Figure S25.** Selected variable temperature inversion recovery (color traces) and fits (black traces) for **7** in  $d^{14}$ -*o*-terphenyl.

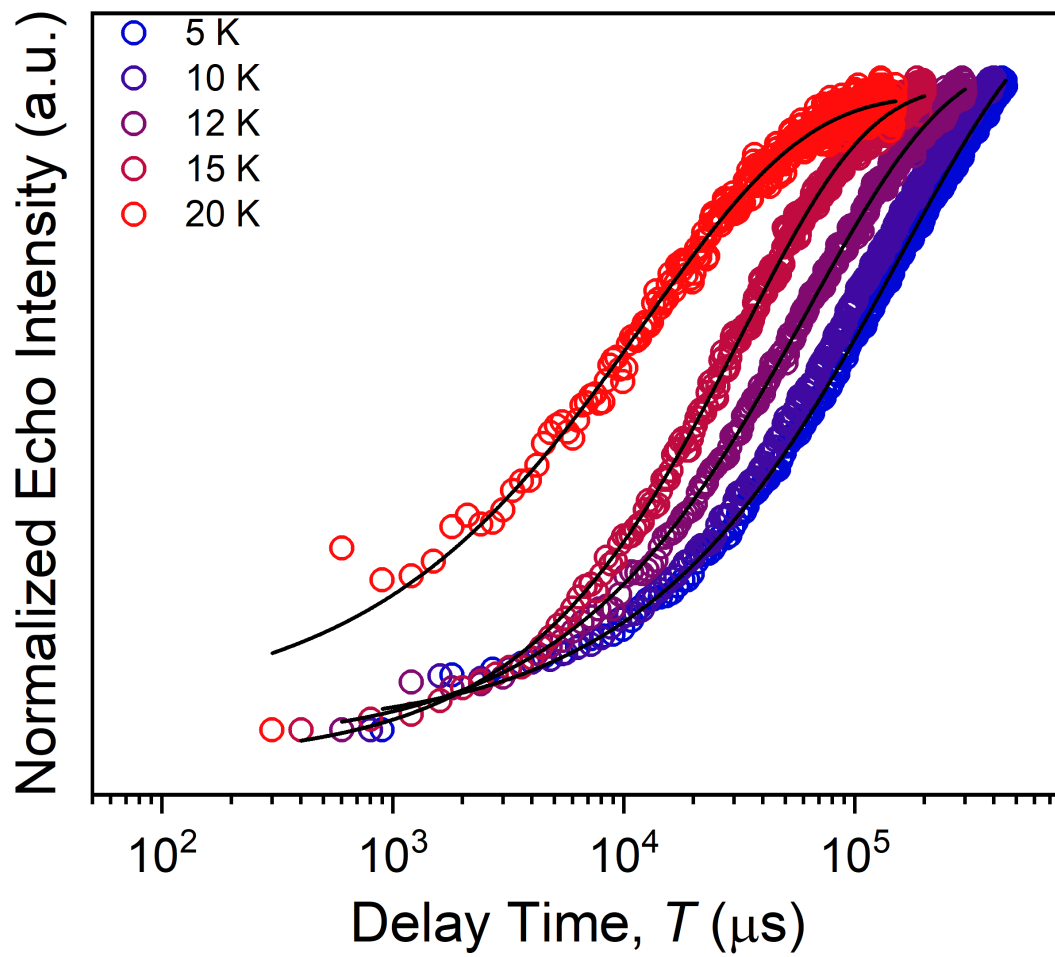

**Figure S26.** Selected variable temperature inversion recovery (color traces) and fits (black traces) for **8** in  $d^{14}$ -*o*-terphenyl.

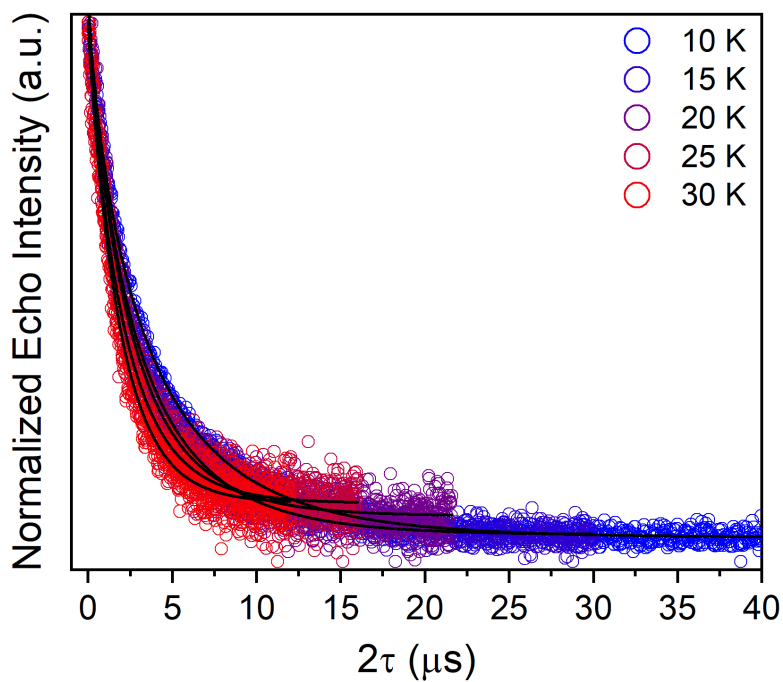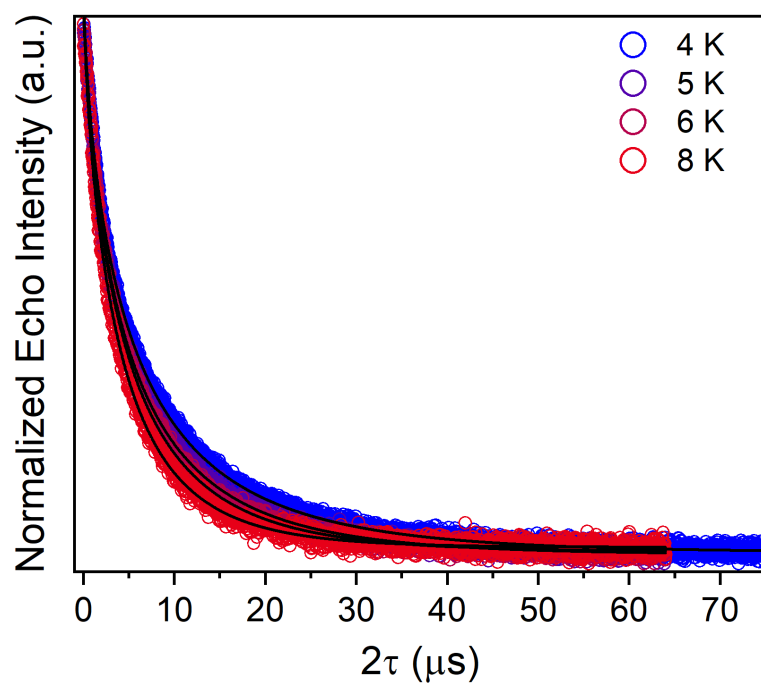

**Figure S27.** Selected variable temperature Hahn echo decay curve (color traces) and fits (black traces) for **1** in  $d^{14}$ -*o*-terphenyl at 120 GHz.

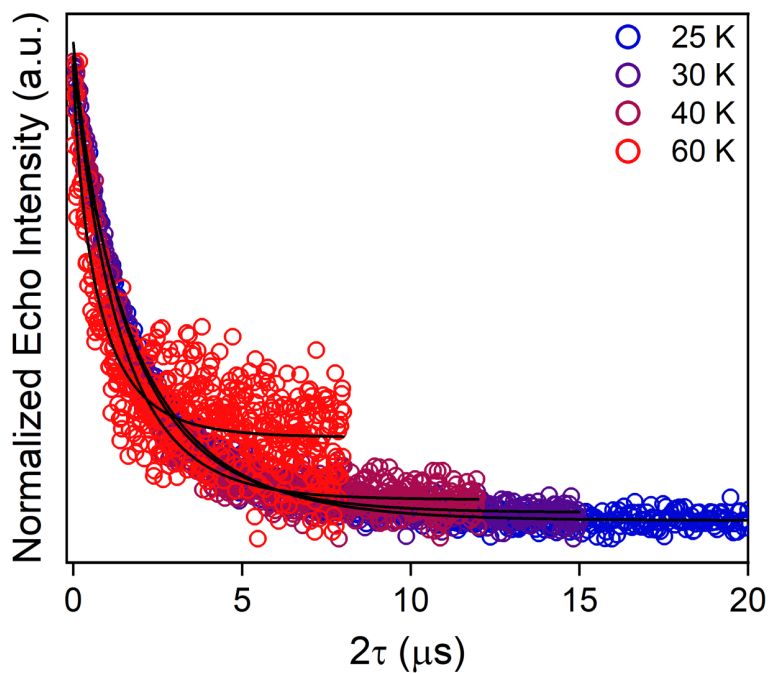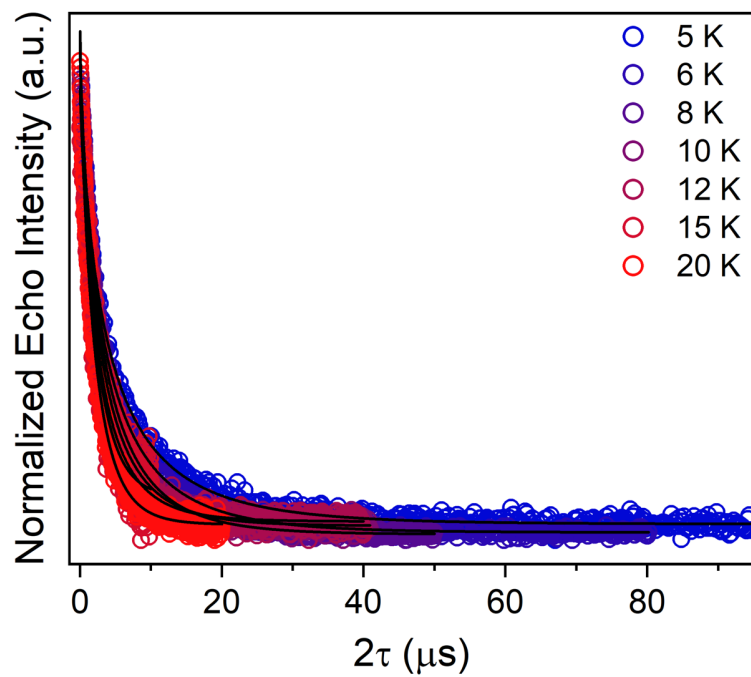

**Figure S28.** Selected variable temperature Hahn echo decay curve (color traces) and fits (black traces) for **2** in  $d^{14}$ -*o*-terphenyl at 120 GHz.

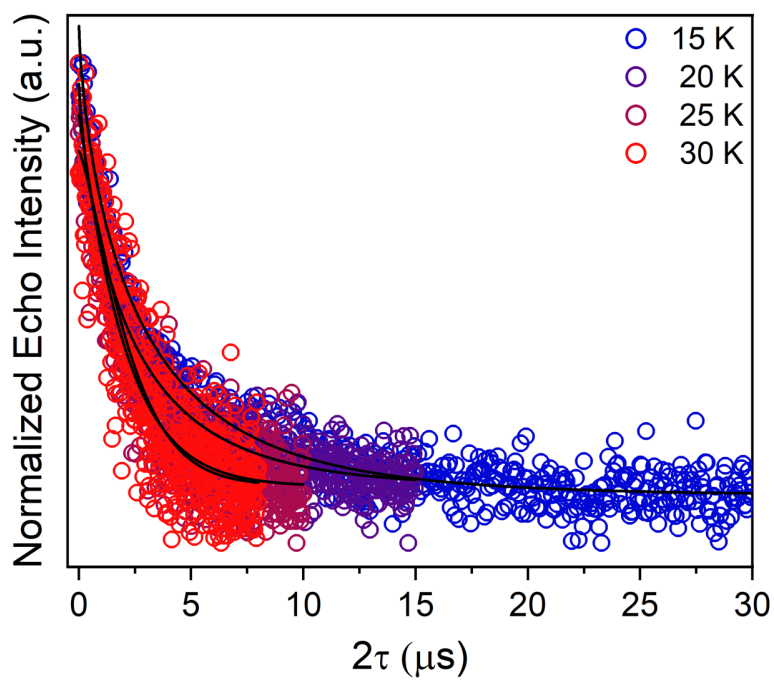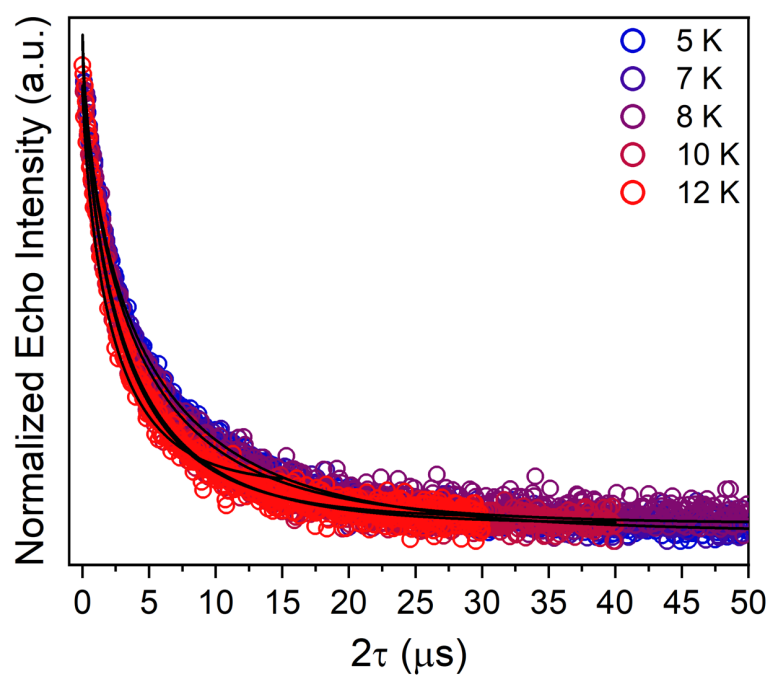

**Figure S29.** Selected variable temperature Hahn echo decay curve (color traces) and fits (black traces) for **3** in  $d^{14}$ -*o*-terphenyl at 120 GHz.

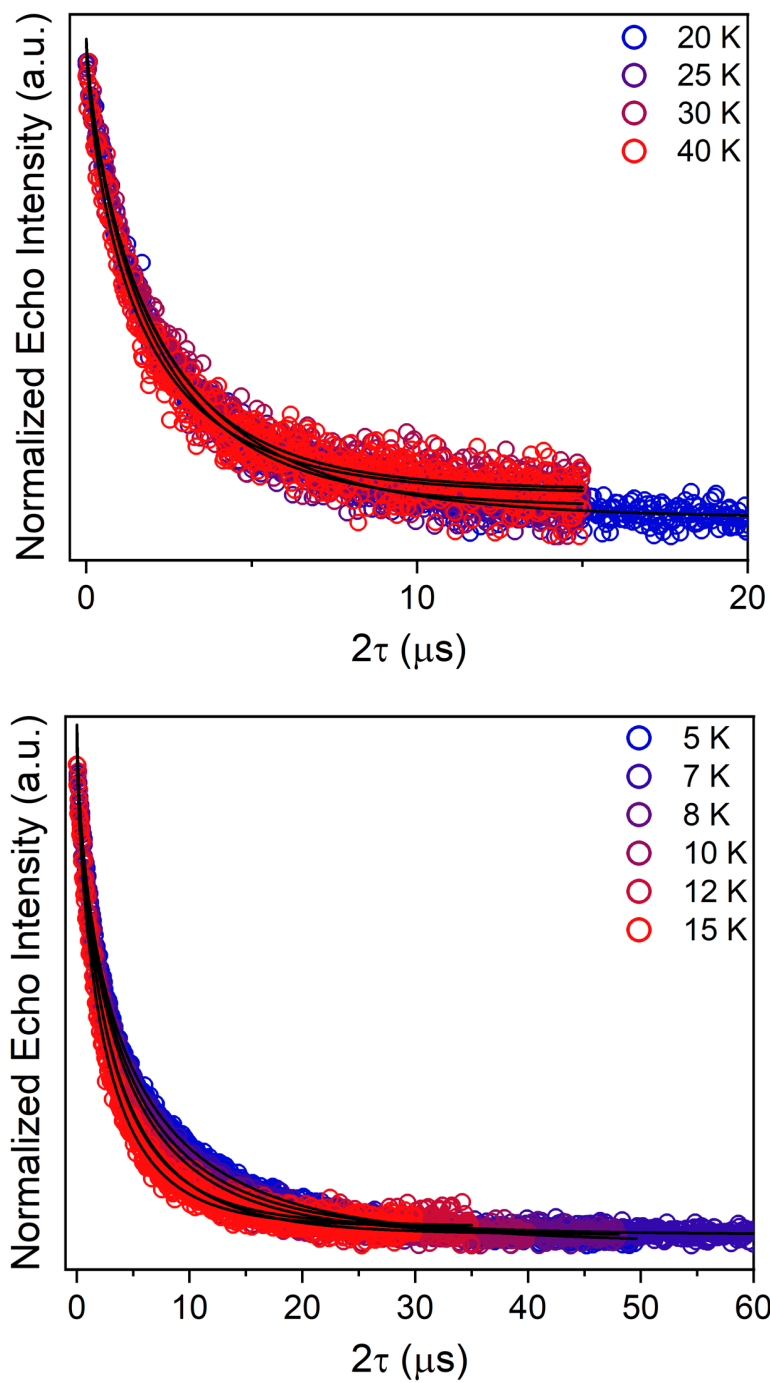

**Figure S30.** Selected variable temperature Hahn echo decay curve (color traces) and fits (black traces) for **4** in  $d^{14}$ -*o*-terphenyl at 120 GHz.

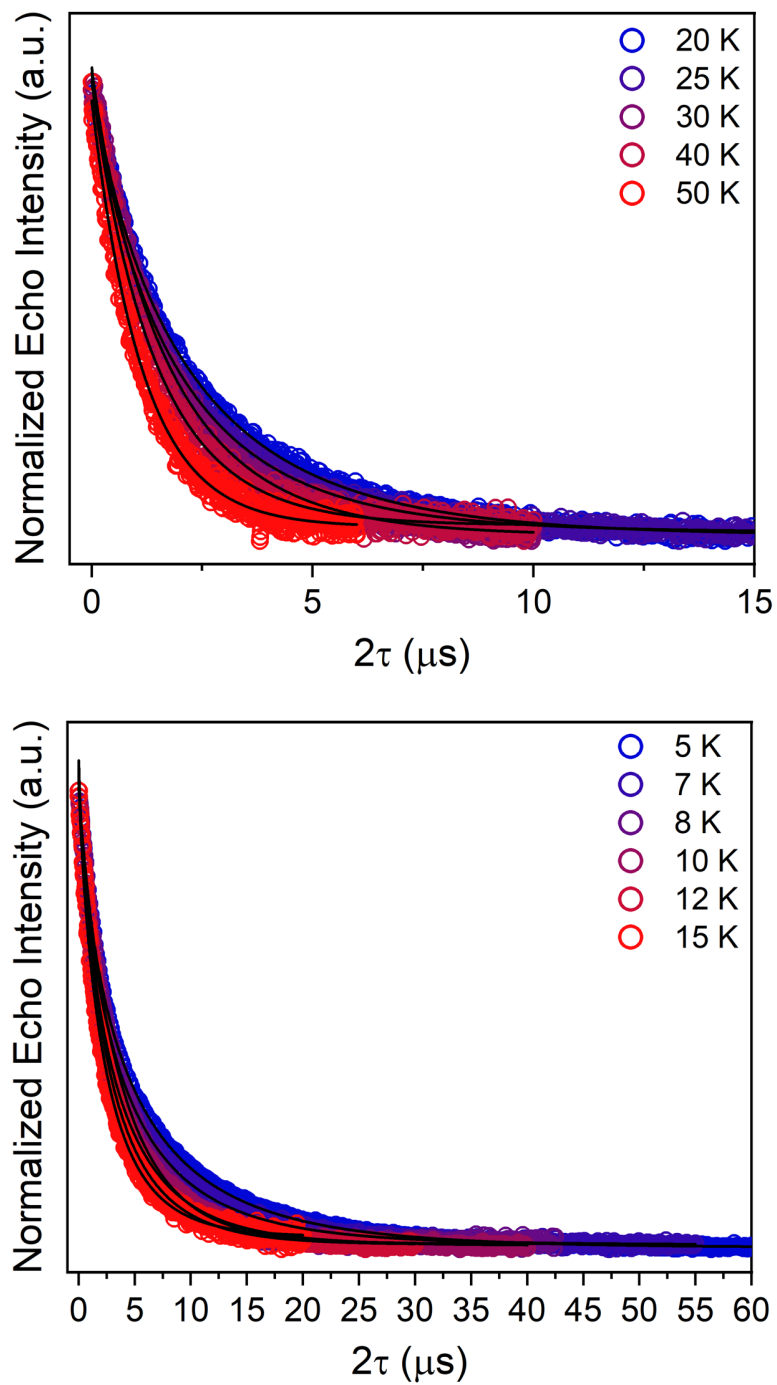

**Figure S31.** Selected variable temperature Hahn echo decay curve (color traces) and fits (black traces) for **5** in  $d^{14}$ -*o*-terphenyl at 120 GHz.



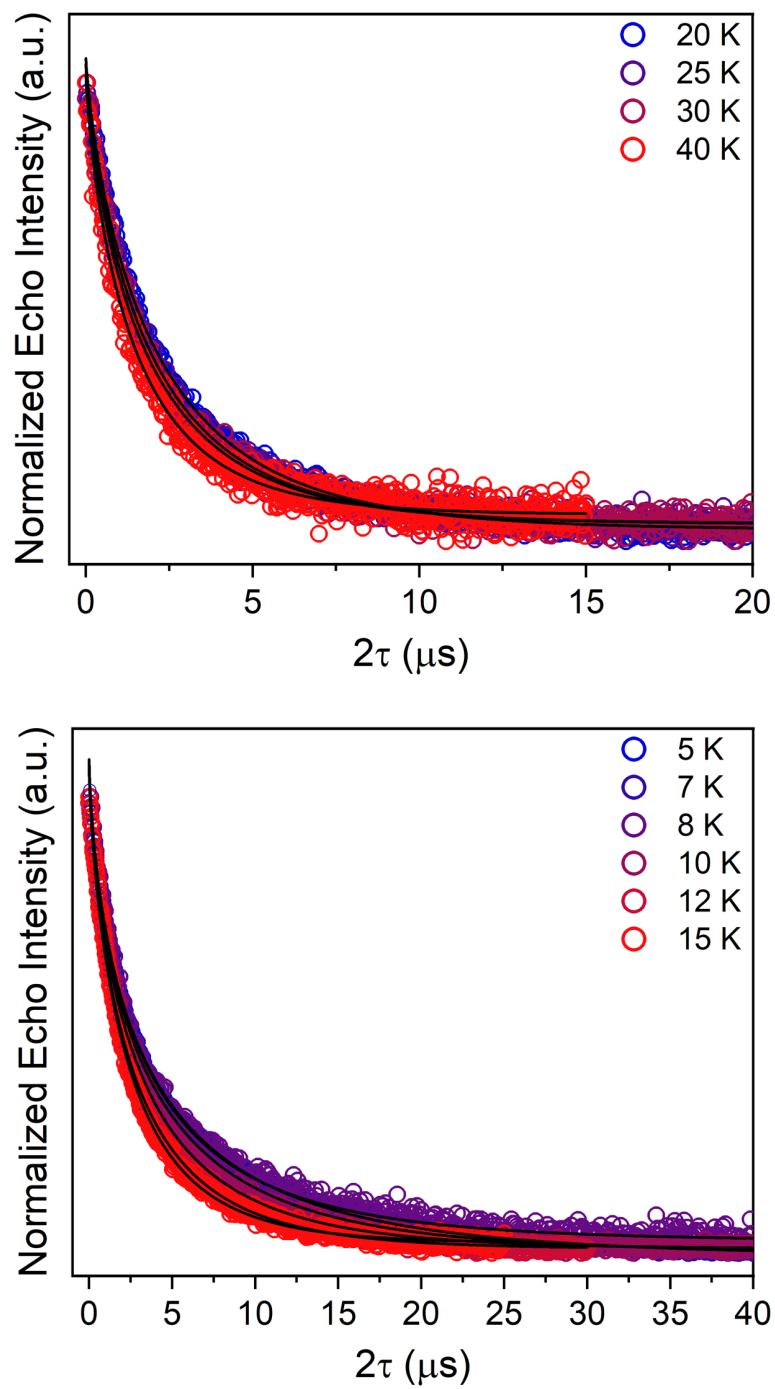

**Figure S32.** Selected variable temperature Hahn echo decay curve (color traces) and fits (black traces) for **6** in  $d^{14}$ -*o*-terphenyl at 120 GHz.

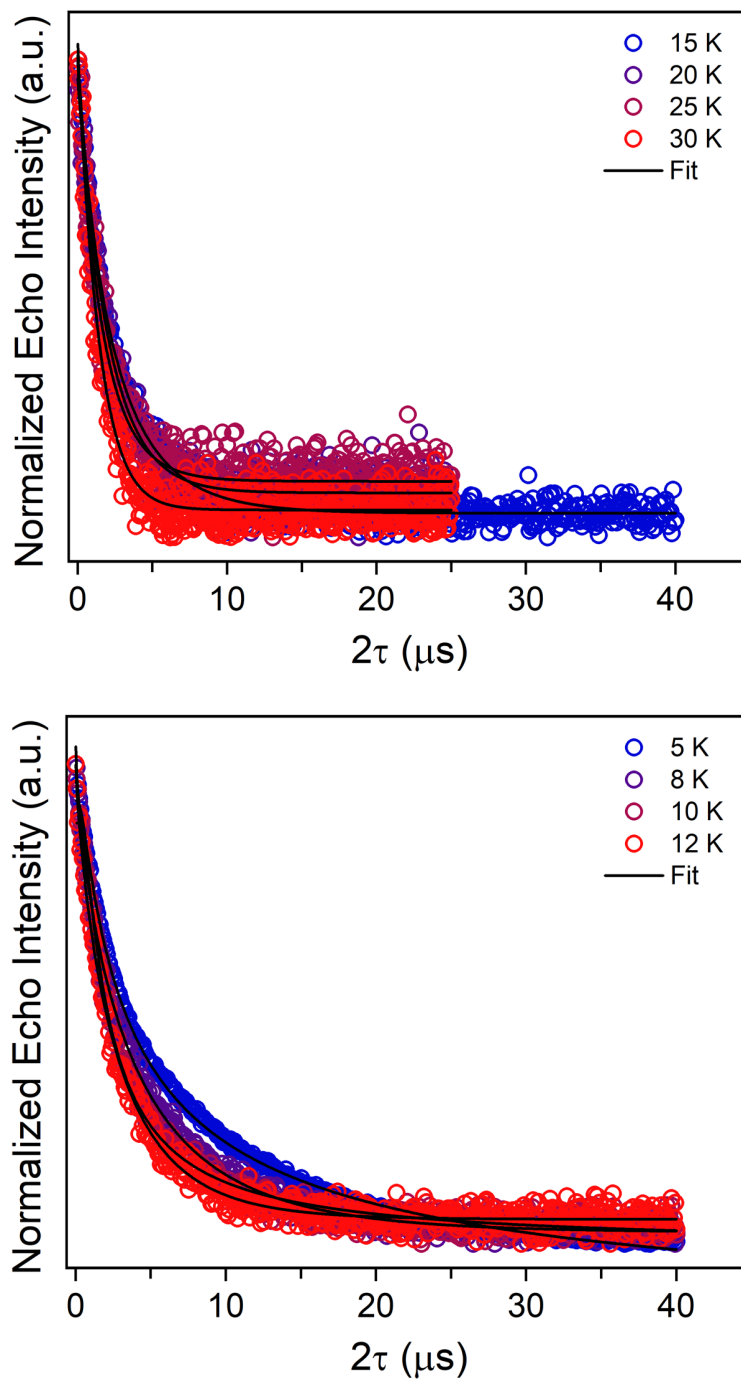

**Figure S33.** Selected variable temperature Hahn echo decay curve (color traces) and fits (black traces) for **7** in  $d^{14}$ -*o*-terphenyl at 120 GHz.

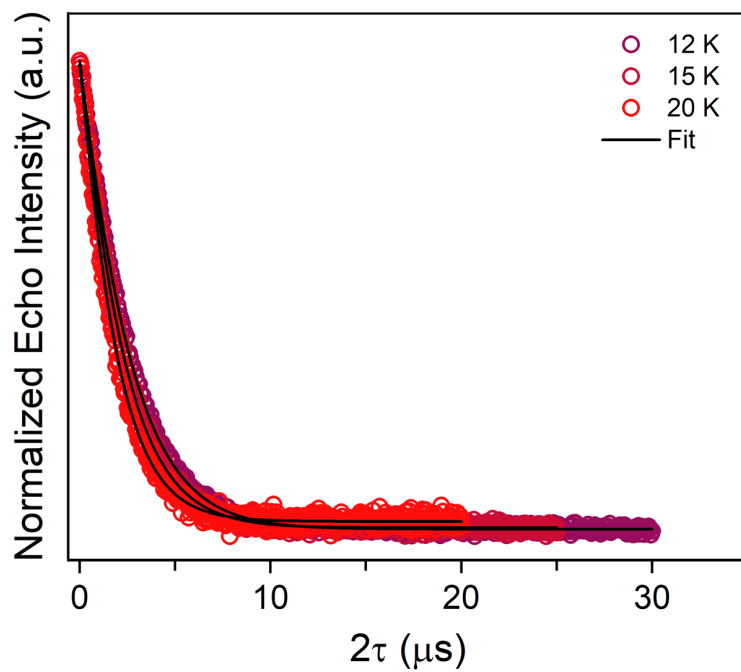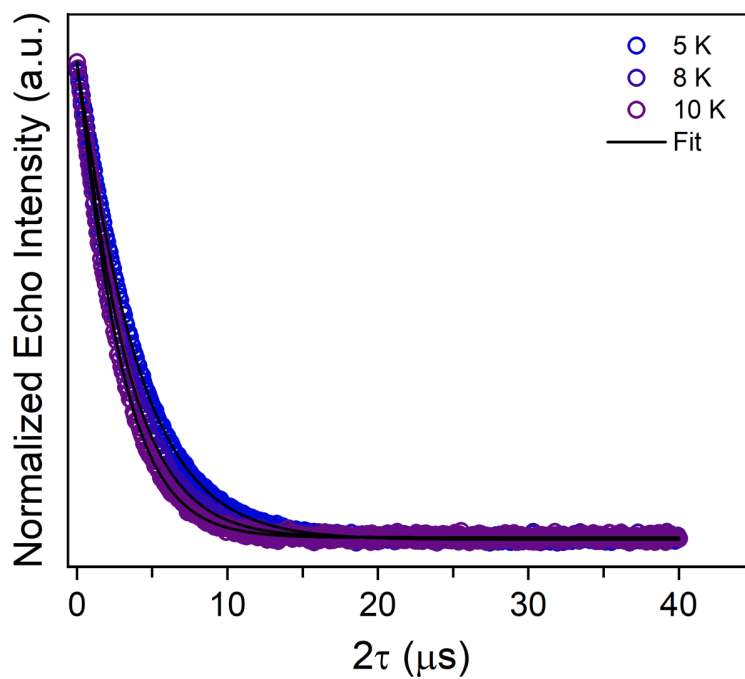

**Figure S34.** Selected variable temperature Hahn echo decay curve (color traces) and fits (black traces) for **8** in  $d^{14}$ -*o*-terphenyl at 120 GHz.

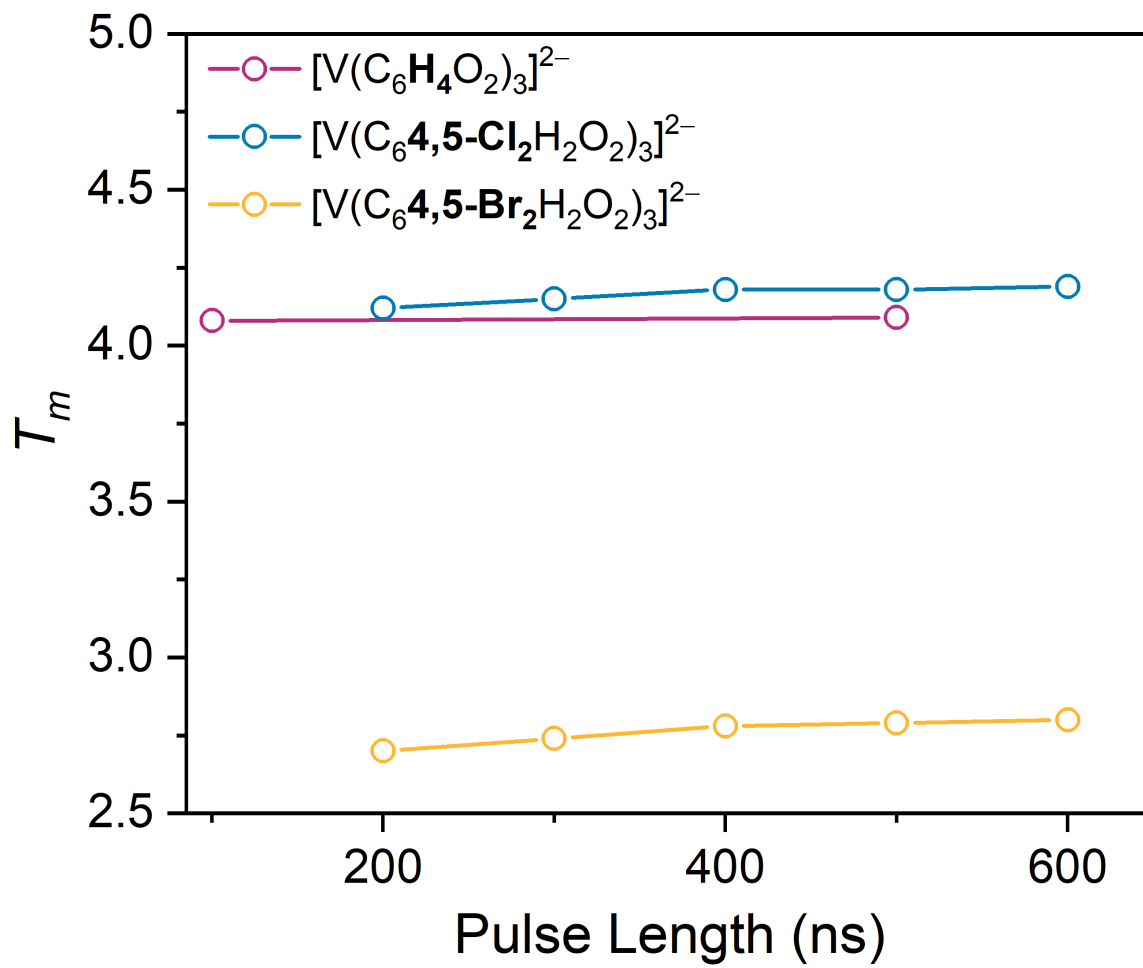

**Figure S35.** Comparison of instantaneous diffusion results of **1**, **5**, and the bromine analogue of **5** in  $d^{14}$ -*o*-terphenyl at 120 GHz.
